# Supplementary material for: Effect of national implementation of utstein recommendation from the global resuscitation alliance on ten steps to improve outcomes from Out-of-Hospital cardiac arrest: a ten-year observational study in Korea
Source: PubMed Central journal article supplement — BMJ Open. 2017 Aug 21;7(8):e016925. doi: 10.1136/bmjopen-2017-016925 (PMC5724141; doi:10.1136/bmjopen-2017-016925), 2017-08-21
Supplement: bmjopen-2017-016925.draft_revisions.pdf [file bmjopen-2017-016925.draft_revisions.pdf]

# BMJ Open

BMJ Open is committed to open peer review. As part of this commitment we make the peer review history of every article we publish publicly available.

When an article is published we post the peer reviewers' comments and the authors' responses online. We also post the versions of the paper that were used during peer review. These are the versions that the peer review comments apply to.

The versions of the paper that follow are the versions that were submitted during the peer review process. They are not the versions of record or the final published versions. They should not be cited or distributed as the published version of this manuscript.

BMJ Open is an open access journal and the full, final, typeset and author-corrected version of record of the manuscript is available on our site with no access controls, subscription charges or pay-per-view fees (<http://bmjopen.bmj.com>).

If you have any questions on BMJ Open's open peer review process please email [editorial.bmjopen@bmj.com](mailto:editorial.bmjopen@bmj.com)

# BMJ Open

## Effect of National Implementation of Utstein Ten-step Cardiopulmonary Resuscitation Programs on Outcomes of Out-of-Hospital Cardiac Arrest: A Ten-Year Observational Study

|                                 |                                                                                                                                                                                                                                                                                                                                                                                                                                                                                                                                                                                                                                                                                                                                                                      |
|---------------------------------|----------------------------------------------------------------------------------------------------------------------------------------------------------------------------------------------------------------------------------------------------------------------------------------------------------------------------------------------------------------------------------------------------------------------------------------------------------------------------------------------------------------------------------------------------------------------------------------------------------------------------------------------------------------------------------------------------------------------------------------------------------------------|
| Journal:                        | <i>BMJ Open</i>                                                                                                                                                                                                                                                                                                                                                                                                                                                                                                                                                                                                                                                                                                                                                      |
| Manuscript ID                   | bmjopen-2017-016925                                                                                                                                                                                                                                                                                                                                                                                                                                                                                                                                                                                                                                                                                                                                                  |
| Article Type:                   | Research                                                                                                                                                                                                                                                                                                                                                                                                                                                                                                                                                                                                                                                                                                                                                             |
| Date Submitted by the Author:   | 21-Mar-2017                                                                                                                                                                                                                                                                                                                                                                                                                                                                                                                                                                                                                                                                                                                                                          |
| Complete List of Authors:       | Kim, Young Taek; Korea Centers for Disease Control and Prevention, Division of Chronic Disease Management<br>Shin, Sang Do; Seoul National University Hospital, Department of Emergency Medicine<br>Hong, Sung Ok; Korea Centers for Disease Control and Prevention<br>Ahn, Ki Ok; Seonam University College of Medicine Myongji Hospital<br>Ro, Young Sun; Seoul National University Hospital Biomedical Research Institute, Laboratory of Emergency Medical Services<br>Song, Kyoung Jun; Seoul National University College of Medicine, Department of Emergency Medicine<br>Hong, Ki Jeong; Seoul National University College of Medicine, Emergency Medicine; Seoul National University Seoul Metropolitan Government Boramae Medical Center, Emergency Medicine |
| <b>Primary Subject Heading</b>: | Emergency medicine                                                                                                                                                                                                                                                                                                                                                                                                                                                                                                                                                                                                                                                                                                                                                   |
| Secondary Subject Heading:      | Public health                                                                                                                                                                                                                                                                                                                                                                                                                                                                                                                                                                                                                                                                                                                                                        |
| Keywords:                       | Out-of-hospital cardiac arrest, Cardiopulmonary resuscitation, National health policy, Outcomes                                                                                                                                                                                                                                                                                                                                                                                                                                                                                                                                                                                                                                                                      |
|                                 |                                                                                                                                                                                                                                                                                                                                                                                                                                                                                                                                                                                                                                                                                                                                                                      |

SCHOLARONE™  
Manuscripts

## Title

1  
2  
3  
4  
5  
6 1. Title: Effect of National Implementation of Utstein Ten-step Cardiopulmonary Resuscitation  
7 Programs on Outcomes of Out-of-Hospital Cardiac Arrest: A Ten-Year Observational Study  
8

9  
10 2. Running title: Utstein Ten-step CPR Programs and Outcomes  
11

12 3. Authors  
13

14 Young Taek Kim, MD, PhD

15 Korea Centers for Disease Control and Prevention  
16

17 Email: [ruyoung@cdc.go.kr](mailto:ruyoung@cdc.go.kr)  
18

19 Sang Do Shin, MD, PhD  
20

21 Department of Emergency Medicine, Seoul National University College of Medicine  
22

23 Email: [sdshin@snu.ac.kr](mailto:sdshin@snu.ac.kr)  
24

25 Sung Ok Hong, PhD  
26

27 Korea Centers for Disease Control and Prevention  
28

29 Email: [soh822@hanmail.net](mailto:soh822@hanmail.net)  
30

31 Ki Ok Ahn, MD, PhD  
32

33 Laboratory of Emergency Medical Services, Seoul National University Hospital  
34

35 Email: [arendt@gmail.com](mailto:arendt@gmail.com)  
36

37 Young Sun Ro, MD, PhD  
38

39 Laboratory of Emergency Medical Services, Seoul National University Hospital  
40

41 Email: [ro.youngsun@gmail.com](mailto:ro.youngsun@gmail.com)  
42

43 Kyoung Jun Song, MD, PhD  
44

45 Department of Emergency Medicine, Seoul National University College of Medicine  
46

47 Email: [skciva@gmail.com](mailto:skciva@gmail.com)  
48

49 Ki Jeong Hong, MD, PhD  
50

51 Department of Emergency Medicine, Seoul National University Boramae Medical Center  
52

53 Email: [emkjhong@gmail.com](mailto:emkjhong@gmail.com)  
54

55 4. Word count  
56

57 Number: 3098 (excluding abstract, references, tables, and figures)  
58

59 5. Acknowledgements  
60

1  
2  
3  
4 This study was supported by the National Emergency Management Agency of Korea and the  
5 Korea Centers for Disease Control and Prevention (CDC). The study was funded by the Korea  
6 CDC (2011-2015) (Grant No.: 2011- Grant for Private Support Program; 2012-E33010-00; 2013-  
7 E33015-00; 2014-E33011-00; 2015-Grant for Private Support Program).  
8  
9  
10

- 11 6. Corresponding author: Sang Do Shin MD, PhD (Corresponding author)

12 Address: Department of Emergency Medicine, Seoul National University Hospital,

13 101 Daehak-Ro, Jongno-Gu, Seoul 110-744, Korea

14  
15 Phone: +82-2-2072-3257

16  
17 FAX: +82-2-741-7855

18  
19 E-mail: shinsangdo@gmail.com

- 20  
21  
22 7. Keywords

23 Out-of-hospital cardiac arrest, Cardiopulmonary resuscitation, National health policy, Outcomes  
24  
25  
26  
27  
28  
29  
30  
31  
32  
33  
34  
35  
36  
37  
38  
39  
40  
41  
42  
43  
44  
45  
46  
47  
48  
49  
50  
51  
52  
53  
54  
55  
56  
57  
58  
59  
60

## Abstract

### Objectives

The Utstein ten-step implementation strategy (UTIS), a bundle of public cardiopulmonary resuscitation (CPR) programs to improve outcomes after out-of-hospital cardiac arrests (OHCA), has been developed. However it is unclear whether UTIS programs are associated with better outcomes or not.

### Methods

The study was a before- and after-intervention study. Adults OHCA treated by emergency medical service (EMS) from 2006 to 2015 were collected, excluding patients collapsed in ambulance and without outcomes. Phase 1(2009-2011) after (1) national OHCA registry, (2) obligatory CPR education, and (3) public report of OHCA, and phase 2(2012-2015) after (4) telephone CPR and (5) comprehensive EMS quality assurance program were compared with the control period (2006-2008). The primary outcome was good neurological recovery (cerebral performance scale 1 or 2). We tested the association between the phases and outcomes, adjusting for confounders using a multivariate logistic regression model to calculate adjusted odds ratios (AORs) with 95% confidence intervals (CIs).

### Results

A total of 128,888 eligible patients were analyzed. The control, phase 1, and phase 2 study groups were 19.4%, 30.5%, and 50.0% of the whole, respectively. There were significant changes in pre-hospital ROSC (0.8% in 2006 and 7.1% in 2015), survival to discharge (3.0% in 2006 and 6.1% in 2015), and good neurological recovery (1.2% in 2006 and 4.1% in 2015). The AORs (95% CIs) for good neurological recovery were 2.22 (1.91-2.59) for phase 1 and 3.32 (2.87-3.84) for phase 2.

### Conclusion

The national implementation of the UTIS programs was significantly associated with better OHCA outcomes.

1  
2  
3  
4 Article summary

5  
6 Strengths and limitations of this study

- 7  
8 1. The Utstein 10-steps of CPR programs, new concept of implementation strategy, were  
9 evaluated for the effect on the outcomes after OHCA. Of 10 steps, (1) national OHCA registry,  
10 (2) obligatory CPR education, (3) public report of OHCA, (4) telephone CPR, and (5)  
11 comprehensive EMS quality assurance program were implemented in the study setting. The  
12 each implementation steps were associated with better outcomes.  
13  
14 2. The study analyzed the 10-years consecutive observations using a national out-of-hospital  
15 cardiac arrest registry between before- and after-implementation of CPR programs. The study  
16 covers the whole country where the CPR programs were mandatory implemented rather than  
17 selectively.  
18  
19 3. Implementation was defined as a program was enacted or started. But the degree of  
20 implementation or real change by implementation was not fully measured. This might be  
21 related with measurement bias  
22  
23 4. A natural change by years could not be completely adjusted for, even though we adjusted for  
24 individual risk factors when calculating the effect size. The before- and after-intervention  
25 study has those limitations.  
26  
27 5. Emergency medical services with low service level were different from North America or  
28 European countries where advanced life support are given to OHCA at the field. Therefore the  
29 generalization should be cautious.  
30  
31  
32  
33  
34  
35  
36  
37  
38  
39  
40  
41  
42  
43  
44  
45  
46  
47  
48  
49  
50  
51  
52  
53  
54  
55  
56  
57  
58  
59  
60

1  
2  
3  
4 Effect of National Implementation of Utstein Ten-step Cardiopulmonary Resuscitation Programs on  
5 Outcomes of Out-of-Hospital Cardiac Arrest: A Ten-Year Observational Study  
6  
7

8  
9 BACKGROUND  
10

11  
12 Out-of-hospital cardiac arrest (OHCA) is a serious public health problem due to high incidence and  
13 low survival rates worldwide. (1-3) To improve the survival rates, community, emergency medical  
14 services (EMSs), and hospital efforts should be closely linked on the basis of evidence and scientific  
15 guidelines. (4-8) However, the implementation of evidence-based cardiopulmonary resuscitation  
16 (CPR) programs has been difficult due to socioeconomic, cultural, administrative, and behavioral  
17 barriers.  
18

19  
20 The Utstein Implementation Meeting was held in 2015 in Stavanger, Norway to discuss ways to  
21 implement scientific recommendations at the community level. The result of this meeting was the  
22 Utstein Ten-step Implementation Strategy (UTIS) for improving cardiac arrest survival". (See the  
23 <http://www.resuscitationacademy.org/wp-content/uploads/2016/03/A-Call-to-Establish-a-Global-Resuscitation-Alliance1.pdf>). The report from the meeting recommended the followings steps derived  
24 from expert consensus: 1) Cardiac arrest registry, 2) Telephone CPR, 3) High-performance CPR, 4)  
25 Rapid dispatch, 5) Measurement of professional resuscitation, 6) Automatic external defibrillator  
26 (AED) program for first responders, 7) Smart technologies for CPR and AED, 8) Mandatory training  
27 for CPR and AED, 9) Accountability, and 10) Culture of excellence.  
28

29  
30 The UTIS was derived from many studies and experiences in different communities. However, the  
31 extent of the impact of implementing the UTIS CPR program at the national level on outcomes is  
32 unclear. The goal of this study was to test the association between national implementation of the  
33 UTIS programs and outcomes of OHCA, as well as to test the interaction effect of the implementation  
34 of UTIS on outcomes across bystander CPR groups.  
35  
36

37  
38  
39  
40  
41  
42  
43  
44  
45  
46  
47  
48  
49  
50  
51 METHODS  
52

53  
54  
55 This is a before- and after-intervention study to test the association between the national  
56

1  
2  
3  
4 implementation of novel CPR programs and outcomes after OHCA. The Korea Centers for Disease  
5 Control and Prevention (CDC) approved the use of all data, and the study was approved by the  
6 Institutional Review Board of the study site.  
7  
8  
9

#### 10 11 Study setting

12  
13 Approximately 50 million people live in a 99,000 km<sup>2</sup> area of land, where there were multiple regional  
14 and local government / hospital organizations: in 2015, there were 17 provinces and 253 local health  
15 departments (including 253 local health centers), 17 provincial fire departments, 200 local EMS  
16 agencies (966 ambulance stations and 1282 ambulances), and 546 emergency departments (EDs) (20  
17 level 1 regional EDs, 2 specialty EDs, 124 level 2 local EDs, 274 level 3 emergency rooms, and 126 level  
18 4 non-designated urgent facilities). (Available at [http://www.e-](http://www.gen.or.kr/nemc/statistics_annual_report.do)  
19 [gen.or.kr/nemc/statistics\\_annual\\_report.do](http://www.gen.or.kr/nemc/statistics_annual_report.do) and  
20 <https://www.mpss.go.kr/home/policy/statistics/statisticsData/>)  
21  
22  
23  
24  
25  
26

27  
28 The Ministry of Health and Welfare EMS program is responsible for emergency care services, acts and  
29 regulations, budgeting and policy planning. The Korea Centers for Disease Control and Prevention  
30 (CDC) is responsible for the community CPR program by developing national standards and  
31 education programs. The National Medical Center is responsible for hospital-based emergency care  
32 through the ED evaluation program and reimbursement programs for hospital emergency care. The  
33 Central Fire Services (CFS) is responsible for pre-hospital ambulance services related to EMS (9, 10).  
34  
35  
36  
37  
38

#### 39 40 Data sources

41  
42 The Korea OHCA Registry (KOHCAR) of cardiac arrest patients transported by ambulance services  
43 since 2006 has been constructed by the Korea CDC in collaboration with the central fire services  
44 (CFS). The EMS run sheet, EMS CPR registry, and dispatch CPR registry were merged into one EMS-  
45 assessed cardiac arrest database by the EMS quality committee of the CFS, which was sent to the  
46 Korea CDC. The Korea CDC cleaned the database of hospital information and reviewed the hospital  
47 records regarding inpatient care and outcomes. (9-12) The KOHCAR was developed on the basis of  
48 recommendations from the international OHCA database and has been modified several times to fit  
49 the needs of health policy and planning, cost-effective data collection, and academic requirements.  
50  
51  
52  
53  
54  
55  
56  
57  
58  
59  
60



1  
2  
3  
4 Data quality management (DQM) was performed in two steps. First, the CFS educated and trained  
5 EMTs (mostly level 1) to record EMS data through the data dictionary of EMS record variables and  
6 education program. Medical oversight for each case was performed by EMS medical directors. Second,  
7 the Korea CDC educated and trained the hospital medical record reviewers (approximately 15  
8 persons), who were employed by the Korea CDC and worked only for the medical record review  
9 program. They were trained on data dictionary and case review protocols and dispatched to all  
10 hospitals to gather information on hospital care and outcomes. The first and second steps were  
11 supported by the same DQM committee members, consisting of EMS physicians, epidemiology and  
12 statistical experts, cardiologists, and medical record review experts. Every month, the DQM reviewed  
13 the collected data from the CFS and Korea CDC and sent feedback to both government partners.  
14  
15  
16  
17  
18  
19  
20  
21  
22  
23

#### 24 Study population

25 All adult patients (older than 15 years) with OHCA and with cardiac etiology transported by  
26 ambulance services between 2006 and 2015 were selected. We excluded patients who did not receive  
27 resuscitation in the field or during ambulance transport, patients who suffered an arrest at a hospital  
28 ED, arrests that were witnessed by EMS providers, and patients for whom outcome information was  
29 not available.  
30  
31  
32  
33  
34  
35  
36

#### 37 National interventions and study groups

38 To decide whether the UTIS program was or was not implemented in a community, each program was  
39 defined using a standard operational definition agreed to by the consensus of the study authors and  
40 the attendees of the GRA meeting at the EMS ASIA 2016 Congress (See Appendix 1 for the UTIS  
41 implementation status checklist that was discussed in the meeting).  
42  
43  
44

45 The national intervention was defined as programs introduced under a new Act Article related to  
46 community, EMS, and hospital CPR programs among the UTIS programs. We finally selected and  
47 defined five of ten programs to make up a national intervention as follows: 1) Korea OHCA Registry  
48 (2008) 2) Telephone CPR (2011) 3) High performance CPR program (not implemented), 4) Rapid  
49 dispatch (2015), 5) Measurement of professional resuscitation (not implemented), 6) AED program  
50 for first responders (not implemented), 7) Smart technology for CPR and AED (not implemented), 8)  
51  
52  
53  
54  
55  
56  
57  
58  
59  
60

1  
2  
3  
4 Mandatory training program for CPR and AED (2008). 9) Accountability (2008), and 10) Cultural  
5  
6 excellence (2011). We defined the intervention year as one year after the Act was enacted in the  
7  
8 national assembly or the government regulation process began.

9  
10 The KOHCAR started the CAVAS project in 2008 and applied and was approved for status as national  
11  
12 statistics in 2009. The Telephone CPR program was implemented in Seoul in 2011 and implemented  
13  
14 throughout the country in 2012, with mandatory inclusion in the dispatch CPR registry under the  
15  
16 Rescue and EMS Act. Mandatory training programs for legally defined first responders, such as  
17  
18 drivers, schoolteachers, police officers, rescuers and guards, were started by the EMS Act in 2008.  
19  
20 Another obligatory training program for students and teachers was implemented in 2012 by the  
21  
22 School Health Act. All students in each primary, middle, and high school are required to attend at  
23  
24 least one session of CPR training during each school year. Every schoolteacher is expected to learn  
25  
26 CPR every three years, and health and sports teachers should retrain annually. Accountability for CPR  
27  
28 was implemented in 2009. All statistics on CPR were reported to the public and the media via an  
29  
30 annual symposium and press reports since 2009 and sent to all organizations. The cultural excellence  
31  
32 in CPR program was selected because under the Rescue and EMS Act, EMS medical directors have  
33  
34 been working at local fire departments as employed medical directors since 2012. Every individual  
OHCA case was reviewed by the directors and scored for feedback to EMS providers.

35  
36 We defined the five interventions and control according to the year of implementation as follows: 1)  
37  
38 KOHCAR (2009), 2) Telephone CPR (2012), 3) Mandatory CPR program (2009), 4) Accountability  
39  
40 (2009), and 5) Cultural excellence (2012). From those set time points, we defined the three phases of  
41  
42 the observational period: 1) Control phase (2006-2008), 2) Primary intervention (phase 1) (2009-  
43  
44 2011) after implementing KOHCAR, Mandatory CPR training, and Accountability, and 3) Secondary  
45  
46 intervention (phase 2) (2012-2015) after implementing the T-CPR program and Cultural excellence,  
47  
48 including EMS quality assurance programs (Figure 1).

#### 49 50 Data variables

51  
52 We selected several potential confounders for outcomes. These confounders included age, gender,  
53  
54 urbanization level (metropolitan city>1 million population, urban/suburban city>50000 population,  
55  
56 and rural< 50000 per county), place of the event (public, private, unknown), event witness (witnessed,  
57  
58  
59  
60

1  
2  
3  
4 unwitnessed), bystander CPR (yes or no), bystander defibrillation (yes or no), dispatcher assistance  
5 (yes or no), cause (cardiac, trauma, poisoning, drowning, asphyxia/hanging, and other), primary ECG  
6 rhythm (VF/ pulseless VT, PEA, asystole), date and time of onset (season, weekday, and day/ night),  
7  
8 number of members of ambulance crew, top level of EMS providers (level 1, level 2, lower), airway  
9 management (endotracheal intubation, supraglottic airway, bag-valve mask ventilation, passive  
10 oxygen ventilation), EMS defibrillation (yes or no), elapsed time intervals (response time interval  
11 (RTI), scene time interval (STI), transport time interval (TTI), trauma level of ED (level 1 to 4),  
12 achievement of pre-hospital ROSC, survival to discharge, and a measure of neurological recovery,  
13 such as cerebral performance category 1 or 2.  
14  
15  
16  
17  
18  
19

#### 20 21 22 Outcome measure

23  
24 The primary outcome was survival with good neurological recovery (CPC 1 or 2) at discharge. The  
25 secondary outcome was survival to discharge. The tertiary outcome was pre-hospital ROSC. All  
26 outcomes were measured by the Korea CDC medical record reviewers, who had visited the hospital to  
27 evaluate the medical records. They extracted information from the hospital discharge summaries,  
28 which are usually used for the national health insurance reimbursement program.  
29  
30  
31  
32  
33

#### 34 35 Statistical analysis

36  
37 Demographic findings were described as percentages (%) for categorical variables or medians (q1 and  
38 q3) and were compared using the Chi-square test or Wilcoxon rank sum test. Potential risk factors  
39 were tested for trends by year. We tested the trend for age- and gender-standardized outcomes using  
40 the whole study population as a standard population.  
41  
42

43  
44 Each UTIS intervention was tested for the association with outcome variables, and then we tested the  
45 UTIS intervention phases 1 and 2 (phase 1 in 2009-2011 and phase 2 in 2012-2015) compared with the  
46 control phase group (2006-2008), adjusting for the potential confounders identified above. Potential  
47 confounders were selected to avoid the mediator effect. We performed a multivariate logistic  
48 regression analysis for the UTIS on the outcomes, adjusted for potential confounders such as age,  
49 gender, urbanization level of the event location, place (private, public, unknown), event witness  
50 (witnessed, unwitnessed, unknown), primary ECG rhythm (VF/pulseless VT, PEA, and asystole),  
51  
52  
53  
54  
55  
56

1  
2  
3  
4 response time intervals from call to ED arrival, scene time interval (STI) from arrival to the scene and  
5 departure to ED, advanced airway management (ETI, SGA, BVM, PV), and level of ED (level 1 to 4) for  
6 all patients.  
7

8  
9 Additionally, interaction analysis was performed using an interaction model with the interaction term  
10 (study phase\*bystander CPR), which was added to the final multivariate logistic regression model.  
11  
12

## 13 14 15 RESULTS

### 16 17 18 Demographics

19  
20 Of 229,361 OHCA during the study period, a total of 128,888 eligible patients were analyzed,  
21 excluding patients who were less than age 15 (n=4,478), had non-cardiac etiologies for arrest  
22 (n=68,152), for whom resuscitation was not attempted (n=23,807), whose arrest was witnessed in an  
23 ambulance (n=39,090), or who did not have available hospital outcome information (n=127). (Fig. 2)

24  
25 The demographics among study groups are compared in Table 1. Compared with the control group,  
26 the phase 1 and 2 groups had the following characteristics: older, predominantly female, occurred  
27 more often in private places, more shockable rhythms, less witnessed, more bystander CPR, staffing  
28 with more level 1 EMTs, more members in the ambulance crew, longer response times, increased  
29 scene time intervals, more advanced airway management, and higher trauma levels of ED (all p values  
30 <.001). Patients included in Phases 1 and 2 had much better outcomes than those in the control phase  
31 (all p values <.001).  
32  
33  
34  
35  
36  
37  
38  
39  
40  
41

### 42 43 Trend analysis

44  
45 Fig. 3 shows trends in bystander CPR, pre-hospital ROSC, survival to discharge, and good  
46 neurological recovery. There were significant changes from 2006 to 2015 in bystander CPR (1.2% in  
47 2006 versus 16.4% in 2016), pre-hospital ROSC (0.8% in 2006 versus 7.1% in 2015), survival to  
48 discharge (3.0% in 2006 versus 6.1% in 2015), and good neurological recovery (1.2% in 2006 versus  
49 4.1% in 2015). (p for trend <.001)  
50  
51  
52

53  
54 The age-and gender-standardized survival rates (SSRs) were calculated using a direct standardization  
55 that used the whole OHCA population during study period as a reference population (Table 2). SSRs  
56  
57  
58  
59  
60

1  
2  
3  
4 were 2.6 in 2006 versus 6.9 in 2015 per 100 OHCA person-years. SSRs with good neurological  
5 recovery were 0.8 in 2006 versus 4.7 in 2015 per 100 OHCA person-years.

6  
7 Table 3 shows the trend of risk factors stratified by year. Metropolitan locations, season and weekend  
8 were not significantly changed by year (p for trend >0.001). The proportions of women and elderly  
9 patients, private places, and unwitnessed OHCAs, as well as shorter response time intervals (4 min.),  
10 were increased (p for trend <.001) and were correlated with poor outcomes. By contrast, proportions  
11 of bystander CPR and shockable rhythm, longer scene time intervals (>8 min.), increase in the  
12 number and level of EMT crew members, advanced airway management, and higher trauma level of  
13 ED of the destination hospital were increased (p for trend <.001) and were correlated with better  
14 outcomes.  
15  
16  
17  
18  
19  
20  
21

#### 22 23 24 Multivariate logistic analysis

25  
26 Table 4 shows the association between implementation phase and outcome from multivariate logistic  
27 regression analysis. AORs (95% CIs) on good neurological recovery in model 2 were 2.22 (1.91-2.59)  
28 for phase 1 and 3.32 (2.87-3.84) for phase 2. AORs (95% CI) in model 2 were 1.95 (1.77-2.13) (phase 1)  
29 and 2.09 (1.91-2.29) (phase 2) on survival to discharge and 2.84 (2.44-3.31) (phase 1) and 5.83 (5.06-  
30 6.73) (phase 2) on pre-hospital ROSC  
31  
32  
33  
34  
35  
36

#### 37 Interaction analysis

38  
39 Interaction analysis for comparison of the effect size by study phase according to bystander  
40 cardiopulmonary resuscitation was performed (Table 5). The implementation of phases 1 and 2 had  
41 different magnitudes of effects on good neurological recovery based on patient groups that received or  
42 did not receive bystander CPR. In terms of good neurological recovery, there was a significant  
43 interaction between phases 1 and 2 and bystander CPR (both p values <.05). There was no significant  
44 interaction between phases 1 and 2 and bystander CPR (both p values <.05). There was no significant  
45 interaction between pre-hospital ROSC in phases 1 or 2 with bystander CPR (both p values >0.05).  
46  
47  
48  
49  
50

#### 51 DISCUSSION

52  
53  
54  
55 During the study period, five programs were implemented, including CPR registry, obligatory CPR  
56  
57  
58  
59  
60

1  
2  
3  
4 training, and public reports in 2008 and telephone-CPR, and in-depth medical oversight for EMS CPR  
5 in 2011. The interventions were found to have significant effects on outcomes in both phases. The  
6 AORs for good CPC were 2.22 in phase 2 and 3.22 in phase 3.  
7

8  
9 During the ten-year study period, the risk factors were influenced by natural changes in characteristics  
10 or by the interventions. To compare the risk factors and outcomes among countries, regions, and local  
11 communities and to monitor the trends by year, we need a novel OHCA registry based on a standard  
12 report form that includes demographic, system-related, EMS-related, and hospital-related  
13 information. (13, 14) There may be huge variations in outcomes in different communities due to  
14 resources, policies, and system efforts during a long study period. (15-17). One of the issues related to  
15 variations in outcomes is the selection bias of denominators and numerators, which can be calculated  
16 with different study population criteria. (18) To select a study population as a denominator, an EMS-  
17 assessed or EMS-treated population would be standardized to determine incidence and trends in  
18 general outcomes. To measure the effect size of the intervention, the Utstein criteria, including  
19 witnessed events and shockable rhythm, are recommended. (13, 19) Risk factors would be different in  
20 different populations, such as in older patients. (20) To compare the outcomes among communities in  
21 the observed time intervals, we used age- and gender-adjusted survival rates as well as Utstein  
22 survival rates instead of crude survival rates. (9, 15, 16)  
23  
24

25  
26 Korea has collected OHCA data for the last ten years and reported the risk factors and outcomes to the  
27 public (9, 10). There were multiple national-level interventions derived and implemented by the  
28 national government and individual-level interventions accepted and practiced by academic societies  
29 and hospitals according to international guidelines (8, 14). The country experienced a rapid increase  
30 in population age and change in EMS protocols for selecting patients or time intervals for providing  
31 CPR in the field, which may influence the calculated outcome rates. (3, 9, 21) For the study period, we  
32 observed changes in both favorable and unfavorable risk factors. Characteristics of the natural  
33 population of OHCA patients that were associated with poor outcomes included increases in the  
34 elderly and in female patients (22-24), increase in response time (3, 25), private location of OHCA (3,  
35 10), and unwitnessed OHCA (9, 10). These risks are related to aging of the population. However,  
36 several favorable factors also increased, such as bystander CPR (3, 16, 26), shockable rhythm (3, 10,  
37 16), scene time interval (21), number of EMTs in the ambulance and level of the top EMT. Advanced  
38  
39  
40  
41  
42  
43  
44  
45  
46  
47  
48  
49  
50  
51  
52  
53  
54  
55  
56

1  
2  
3  
4 life support techniques, such as advanced airway management, increased, though the effect of  
5 advanced life support techniques on outcomes is controversial (27, 28).

7 Primary intervention programs, such as system monitoring using a nationwide OHCA registry,  
8 followed by EMS CPR registry and dispatch registry, might encourage health policy makers to develop  
9 programs to improve outcomes after OHCA. The media reported the nationwide outcomes in 2009  
10 and deeply analyzed the causes of poor outcomes and regional variation and provided solutions to  
11 improve outcomes. Due to active media coverage, the budget was increased to fund CPR training for  
12 lay persons. The OHCA registry enabled monitoring of the various components and revealed  
13 weaknesses that led to poorer outcomes (3, 15, 16, 25, 29).

20 The one of the secondary interventions was the telephone CPR program, and it was reported to have  
21 strong effects (10). This program involved strong education and quality assurance programs.  
22 Dispatch-assisted CPR rates quickly increased in up to 50% of all detected OHCA. The  
23 comprehensive medical oversight program was implemented by the Rescue and EMS Act. In this  
24 program, every EMS agency under a fire department was directed to employ a medical director at  
25 least part-time and to provide a full range of information on CPR performance of the EMS crew,  
26 including an EMS CPR registry and ECG rhythm analysis.

33 Bystander CPR had interaction with study phases for the outcomes. During the study period, the  
34 percentage of patients who received bystander CPR increased continuously. Thus, study phases were  
35 interactively related with bystander CPR. In terms of good CPC, the sizes of the effects of phases 1 and  
36 2 were significantly greater in patients who received bystander CPR.

#### 42 Limitations

44 The first limitation is the definition of intervention used in this study. The study intervention was  
45 operationally defined based on expert consensus. This method could cause measurement bias,  
46 resulting in differences when the program is fully implemented on a larger scale. Potential  
47 interventions were selected from the Utstein Ten-step Implementation Strategy program, and final  
48 interventions were enforced by government acts.

53 The second limitation is the exclusion criteria, including unknown outcomes, pediatric patients and  
54 non-cardiac etiology. Therefore, the results of this study should only be interpreted in the context of  
55

1  
2  
3  
4 the groups of patients enrolled.

5  
6 The third limitation is related to the study setting. In Korea, the emergency services are intermediate,  
7  
8 which is very different from the services provided in North America or Europe. Thus, one should be  
9  
10 cautious with respect to generalizability.

## 11 12 13 COCLUSION

14  
15  
16  
17 Community interventions, including the OHCA registry, regular public reports, mandatory CPR  
18  
19 training programs, telephone CPR program, and medical oversight for EMS CPR performance, which  
20  
21 are recommended by the Utstein Ten-steps Implementation Strategy for improving outcomes of  
22  
23 OHCA, were significantly associated with better outcomes.  
24  
25  
26  
27  
28  
29  
30  
31  
32  
33  
34  
35  
36  
37  
38  
39  
40  
41  
42  
43  
44  
45  
46  
47  
48  
49  
50  
51  
52  
53  
54  
55  
56  
57  
58  
59  
60



#### Contributorship statement

Kim YT has developed the data collection system and led the public health program. Dr. Kim developed the idea of this paper and wrote the draft. Drs. Song KJ, Ro YS, Ahn KO, and Hong KJ collected the data and contributed to the quality management. Dr. Hong SO collected raw data and maintained the quality via education and training the study coordinators. Dr. Shin SD has the full responsibility of the paper. All authors are accessible to the data and agreed with submission of this manuscript to the journal.

#### Competing interests

No conflicts of interest are associated with this study.

#### Funding

This study was supported by the National Emergency Management Agency of Korea and the Korea Centers for Disease Control and Prevention (CDC). The study was funded by the Korea CDC (2011-2015) (Grant No.: 2011- Grant for Private Support Program; 2012-E33010-00; 2013-E33015-00; 2014-E33011-00; 2015-Grant for Private Support Program). And the Central Fire Services provided support for data collection.

#### Data sharing statement

The Korea Centers for Disease Control and Prevention owns the whole data which are accessible to. If a researcher wants to use the data, the researcher should get a permission for the use of the data.

## REFERENCES

1. Berdowski J, Berg RA, Tijssen JG, Koster RW. Global incidences of out-of-hospital cardiac arrest and survival rates: Systematic review of 67 prospective studies. *Resuscitation*. 2010;81(11):1479-87.
2. Grasner JT, Lefering R, Koster RW, Masterson S, Bottiger BW, Herlitz J, et al. EuReCa ONE-27 Nations, ONE Europe, ONE Registry: A prospective one month analysis of out-of-hospital cardiac arrest outcomes in 27 countries in Europe. *Resuscitation*. 2016;105:188-95.
3. Ong ME, Shin SD, De Souza NN, Tanaka H, Nishiuchi T, Song KJ, et al. Outcomes for out-of-hospital cardiac arrests across 7 countries in Asia: The Pan Asian Resuscitation Outcomes Study (PAROS). *Resuscitation*. 2015;96:100-8.
4. Hazinski MF, Nolan JP, Aickin R, Bhanji F, Billi JE, Callaway CW, et al. Part 1: Executive Summary: 2015 International Consensus on Cardiopulmonary Resuscitation and Emergency Cardiovascular Care Science With Treatment Recommendations. *Circulation*. 2015;132(16 Suppl 1):S2-39.
5. Travers AH, Perkins GD, Berg RA, Castren M, Considine J, Escalante R, et al. Part 3: Adult Basic Life Support and Automated External Defibrillation: 2015 International Consensus on Cardiopulmonary Resuscitation and Emergency Cardiovascular Care Science With Treatment Recommendations. *Circulation*. 2015;132(16 Suppl 1):S51-83.
6. Singletary EM, Charlton NP, Epstein JL, Ferguson JD, Jensen JL, MacPherson AI, et al. Part 15: First Aid: 2015 American Heart Association and American Red Cross Guidelines Update for First Aid. *Circulation*. 2015;132(18 Suppl 2):S574-89.
7. Kronick SL, Kurz MC, Lin S, Edelson DP, Berg RA, Billi JE, et al. Part 4: Systems of Care and Continuous Quality Improvement: 2015 American Heart Association Guidelines Update for Cardiopulmonary Resuscitation and Emergency Cardiovascular Care. *Circulation*. 2015;132(18 Suppl 2):S397-413.
8. Callaway CW, Donnino MW, Fink EL, Geocadin RG, Golan E, Kern KB, et al. Part 8: Post-Cardiac Arrest Care: 2015 American Heart Association Guidelines Update for Cardiopulmonary Resuscitation and Emergency Cardiovascular Care. *Circulation*. 2015;132(18 Suppl 2):S465-82.

- 1  
2  
3  
4 9. Ro YS, Shin SD, Song KJ, Lee EJ, Kim JY, Ahn KO, et al. A trend in epidemiology and  
5 outcomes of out-of-hospital cardiac arrest by urbanization level: a nationwide observational study  
6 from 2006 to 2010 in South Korea. *Resuscitation*. 2013;84(5):547-57.
- 7  
8  
9 10. Ro YS, Shin SD, Lee YJ, Lee SC, Song KJ, Ryoo HW, et al. Effect of Dispatcher-Assisted  
10 Cardiopulmonary Resuscitation Program and Location of Out-of-Hospital Cardiac Arrest on Survival  
11 and Neurologic Outcome. *Ann Emerg Med*. 2016.
- 12  
13 11. Ahn KO, Shin SD, Suh GJ, Cha WC, Song KJ, Kim SJ, et al. Epidemiology and outcomes from  
14 non-traumatic out-of-hospital cardiac arrest in Korea: A nationwide observational study.  
15 *Resuscitation*. 2010;81(8):974-81.
- 16  
17 12. Kim JY, Shin SD, Ro YS, Song KJ, Lee EJ, Park CB, et al. Post-resuscitation care and  
18 outcomes of out-of-hospital cardiac arrest: a nationwide propensity score-matching analysis.  
19 *Resuscitation*. 2013;84(8):1068-77.
- 20  
21 13. Jacobs I, Nadkarni V, Bahr J, Berg RA, Billi JE, Bossaert L, et al. Cardiac arrest and  
22 cardiopulmonary resuscitation outcome reports: update and simplification of the Utstein templates  
23 for resuscitation registries: a statement for healthcare professionals from a task force of the  
24 International Liaison Committee on Resuscitation (American Heart Association, European  
25 Resuscitation Council, Australian Resuscitation Council, New Zealand Resuscitation Council, Heart  
26 and Stroke Foundation of Canada, InterAmerican Heart Foundation, Resuscitation Councils of  
27 Southern Africa). *Circulation*. 2004;110(21):3385-97.
- 28  
29 14. Perkins GD, Jacobs IG, Nadkarni VM, Berg RA, Bhanji F, Biarent D, et al. Cardiac Arrest and  
30 Cardiopulmonary Resuscitation Outcome Reports: Update of the Utstein Resuscitation Registry  
31 Templates for Out-of-Hospital Cardiac Arrest: A Statement for Healthcare Professionals From a Task  
32 Force of the International Liaison Committee on Resuscitation (American Heart Association,  
33 European Resuscitation Council, Australian and New Zealand Council on Resuscitation, Heart and  
34 Stroke Foundation of Canada, InterAmerican Heart Foundation, Resuscitation Council of Southern  
35 Africa, Resuscitation Council of Asia); and the American Heart Association Emergency Cardiovascular  
36 Care Committee and the Council on Cardiopulmonary, Critical Care, Perioperative and Resuscitation.  
37 *Resuscitation*. 2015;96:328-40.
- 38  
39 15. Chan PS, McNally B, Tang F, Kellermann A, Group CS. Recent trends in survival from out-of-  
40  
41  
42  
43  
44  
45  
46  
47  
48  
49  
50  
51  
52  
53  
54  
55  
56  
57  
58  
59  
60

1  
2  
3  
4 hospital cardiac arrest in the United States. *Circulation*. 2014;130(21):1876-82.

5  
6 16. McNally B, Robb R, Mehta M, Vellano K, Valderrama AL, Yoon PW, et al. Out-of-hospital  
7 cardiac arrest surveillance --- Cardiac Arrest Registry to Enhance Survival (CARES), United States,  
8 October 1, 2005--December 31, 2010. *MMWR Surveill Summ*. 2011;60(8):1-19.

9  
10  
11 17. Nichol G, Thomas E, Callaway CW, Hedges J, Powell JL, Aufderheide TP, et al. Regional  
12 variation in out-of-hospital cardiac arrest incidence and outcome. *JAMA*. 2008;300(12):1423-31.

13  
14 18. Nishiyama C, Brown SP, May S, Iwami T, Koster RW, Beesems SG, et al. Apples to apples or  
15 apples to oranges? International variation in reporting of process and outcome of care for out-of-  
16 hospital cardiac arrest. *Resuscitation*. 2014;85(11):1599-609.

17  
18  
19  
20 19. McNally B, Stokes A, Crouch A, Kellermann AL, Group CS. CARES: Cardiac Arrest Registry  
21 to Enhance Survival. *Ann Emerg Med*. 2009;54(5):674-83 e2.

22  
23  
24 20. Andersen LW, Bivens MJ, Giberson T, Giberson B, Mottley JL, Gautam S, et al. The  
25 relationship between age and outcome in out-of-hospital cardiac arrest patients. *Resuscitation*.  
26  
27 2015;94:49-54.

28  
29  
30 21. Shin SD, Kitamura T, Hwang SS, Kajino K, Song KJ, Ro YS, et al. Association between  
31 resuscitation time interval at the scene and neurological outcome after out-of-hospital cardiac arrest  
32 in two Asian cities. *Resuscitation*. 2014;85(2):203-10.

33  
34  
35 22. Libungan B, Lindqvist J, Stromsoe A, Nordberg P, Hollenberg J, Albertsson P, et al. Out-of-  
36 hospital cardiac arrest in the elderly: A large-scale population-based study. *Resuscitation*. 2015;94:28-  
37  
38 32.

39  
40  
41 23. Kim LK, Looser P, Swaminathan RV, Horowitz J, Friedman O, Shin JH, et al. Sex-Based  
42 Disparities in Incidence, Treatment, and Outcomes of Cardiac Arrest in the United States, 2003-2012.  
43  
44 *J Am Heart Assoc*. 2016;5(6).

45  
46 24. Ng YY, Wah W, Liu N, Zhou SA, Ho AF, Pek PP, et al. Associations between gender and  
47 cardiac arrest outcomes in Pan-Asian out-of-hospital cardiac arrest patients. *Resuscitation*.  
48  
49 2016;102:116-21.

50  
51 25. Ono Y, Hayakawa M, Iijima H, Maekawa K, Kodate A, Sadamoto Y, et al. The response time  
52 threshold for predicting favourable neurological outcomes in patients with bystander-witnessed out-  
53 of-hospital cardiac arrest. *Resuscitation*. 2016;107:65-70.

- 1  
2  
3  
4 26. Fosbol EL, Dupre ME, Strauss B, Swanson DR, Myers B, McNally BF, et al. Association of  
5 neighborhood characteristics with incidence of out-of-hospital cardiac arrest and rates of bystander-  
6 initiated CPR: implications for community-based education intervention. *Resuscitation*.  
7 2014;85(11):1512-7.  
8  
9  
10  
11 27. McMullan J, Gerecht R, Bonomo J, Robb R, McNally B, Donnelly J, et al. Airway  
12 management and out-of-hospital cardiac arrest outcome in the CARES registry. *Resuscitation*.  
13 2014;85(5):617-22.  
14  
15  
16 28. Jeong S, Ahn KO, Shin SD. The role of prehospital advanced airway management on  
17 outcomes for out-of-hospital cardiac arrest patients: a meta-analysis. *Am J Emerg Med*. 2016.  
18  
19  
20 29. Soholm H, Hassager C, Lippert F, Winther-Jensen M, Thomsen JH, Friberg H, et al. Factors  
21 Associated With Successful Resuscitation After Out-of-Hospital Cardiac Arrest and Temporal Trends  
22 in Survival and Comorbidity. *Ann Emerg Med*. 2015;65(5):523-31 e2.  
23  
24  
25  
26  
27  
28  
29  
30  
31  
32  
33  
34  
35  
36  
37  
38  
39  
40  
41  
42  
43  
44  
45  
46  
47  
48  
49  
50  
51  
52  
53  
54  
55  
56  
57  
58  
59  
60

## FIGURE LEGENDS

Figure 1 National Implementation of Utstein Ten-step Implementation Strategy by study period

CPR: cardiopulmonary resuscitation

AED: automatic external defibrillation

KOHCAR: Korea out-of-hospital cardiac arrest registry

EMS: emergency medical services

T-CPR: telephone CPR

OA: quality assurance

OHCA: out-of-hospital cardiac arrest

Figure 2 Study subjects

EMS: emergency medical service

OHCA: out-of-hospital cardiac arrest

CPR: cardiopulmonary resuscitation

Figure 3 Longitudinal trend of outcomes in out-of-hospital cardiac arrest in Korea

ROSC: return of spontaneous circulation

CPC: cerebral performance scale

Table 1. Demographic findings of study population among intervention phase groups and control

| Variables              | All        |       | Control    |       | Phase 1    |       | Phase 2    |       | P-value |
|------------------------|------------|-------|------------|-------|------------|-------|------------|-------|---------|
|                        | N          | %     | N          | %     | N          | %     | N          | %     |         |
| Total                  | 128888     | 100.0 | 25045      | 100.0 | 39366      | 100.0 | 64477      | 100.0 |         |
| Age                    |            |       |            |       |            |       |            |       | <.001   |
| 15-39, years           | 7004       | 5.4   | 1835       | 7.3   | 2262       | 5.7   | 2907       | 4.5   |         |
| 40-59, years           | 33451      | 26.0  | 7431       | 29.7  | 10590      | 26.9  | 15430      | 23.9  |         |
| 60-79, years           | 59360      | 46.1  | 11661      | 46.6  | 18389      | 46.7  | 29310      | 45.5  |         |
| 80+, years             | 29073      | 22.6  | 4118       | 16.4  | 8125       | 20.6  | 16830      | 26.1  |         |
| Median (q1-q3)         | 56 (70-79) |       | 53 (66-76) |       | 55 (69-78) |       | 58 (72-80) |       |         |
| Gender                 |            |       |            |       |            |       |            |       | <.001   |
| Female                 | 45913      | 35.6  | 8637       | 34.5  | 13789      | 35.0  | 23487      | 36.4  |         |
| Male                   | 82975      | 64.4  | 16408      | 65.5  | 25577      | 65.0  | 40990      | 63.6  |         |
| Metropolis             |            |       |            |       |            |       |            |       | 0.486   |
| Non-metropolis         | 74188      | 57.6  | 14444      | 57.7  | 22736      | 57.8  | 37008      | 57.4  |         |
| Metropolis             | 54700      | 42.4  | 10601      | 42.3  | 16630      | 42.2  | 27469      | 42.6  |         |
| Place                  |            |       |            |       |            |       |            |       | <.001   |
| Public                 | 26282      | 20.4  | 7421       | 29.6  | 7412       | 18.8  | 11449      | 17.8  |         |
| Private                | 101191     | 78.5  | 17265      | 68.9  | 31622      | 80.3  | 52304      | 81.1  |         |
| Unknown                | 1415       | 1.1   | 359        | 1.4   | 332        | 0.8   | 724        | 1.1   |         |
| Primary ECG            |            |       |            |       |            |       |            |       | <.001   |
| VF/pulseless VT        | 8584       | 6.7   | 1327       | 5.3   | 1624       | 4.1   | 5633       | 8.7   |         |
| PEA                    | 7241       | 5.6   | 907        | 3.6   | 1844       | 4.7   | 4490       | 7.0   |         |
| Asystole               | 113063     | 87.7  | 22811      | 91.1  | 35898      | 91.2  | 54354      | 84.3  |         |
| Witnessed              |            |       |            |       |            |       |            |       | <.001   |
| No                     | 71269      | 55.3  | 13190      | 52.7  | 21266      | 54.0  | 36813      | 57.1  |         |
| Yes                    | 57619      | 44.7  | 11855      | 47.3  | 18100      | 46.0  | 27664      | 42.9  |         |
| Bystander CPR          |            |       |            |       |            |       |            |       | <.001   |
| No                     | 118110     | 91.6  | 24553      | 98.0  | 37499      | 95.3  | 56058      | 86.9  |         |
| Yes                    | 10778      | 8.4   | 492        | 2.0   | 1867       | 4.7   | 8419       | 13.1  |         |
| Season                 |            |       |            |       |            |       |            |       | <.001   |
| MAR.-MAY               | 32731      | 25.4  | 6173       | 24.6  | 10152      | 25.8  | 16406      | 25.4  |         |
| JUN.-AUG               | 28166      | 21.9  | 5692       | 22.7  | 8703       | 22.1  | 13771      | 21.4  |         |
| SEP.-NOV               | 21998      | 17.1  | 4329       | 17.3  | 6664       | 16.9  | 11005      | 17.1  |         |
| DEC.-FEB               | 45993      | 35.7  | 8851       | 35.3  | 13847      | 35.2  | 23295      | 36.1  |         |
| Weekend                |            |       |            |       |            |       |            |       | <.001   |
| Weekday                | 90739      | 70.4  | 17519      | 70.0  | 27696      | 70.4  | 45524      | 70.6  |         |
| Weekend                | 38149      | 29.6  | 7526       | 30.0  | 11670      | 29.6  | 18953      | 29.4  |         |
| Hour of the event      |            |       |            |       |            |       |            |       | 0.152   |
| 0-5 hour               | 19123      | 14.8  | 3743       | 14.9  | 5949       | 15.1  | 9431       | 14.6  |         |
| 6-11 hour              | 41729      | 32.4  | 7779       | 31.1  | 12641      | 32.1  | 21309      | 33.0  |         |
| 12-17 hour             | 36745      | 28.5  | 7088       | 28.3  | 11199      | 28.4  | 18458      | 28.6  |         |
| 18-23 hour             | 31291      | 24.3  | 6435       | 25.7  | 9577       | 24.3  | 15279      | 23.7  |         |
| Level of EMT           |            |       |            |       |            |       |            |       | <.001   |
| Level 1                | 89908      | 69.8  | 12888      | 51.5  | 24088      | 61.2  | 52932      | 82.1  |         |
| Level 2                | 32502      | 25.2  | 9336       | 37.3  | 13248      | 33.7  | 9918       | 15.4  |         |
| Level 3                | 6478       | 5.0   | 2821       | 11.3  | 2030       | 5.2   | 1627       | 2.5   |         |
| No of ambulance crew   |            |       |            |       |            |       |            |       |         |
| 1                      | 16187      | 12.6  | 6504       | 26.0  | 4418       | 11.2  | 5265       | 8.2   |         |
| 2                      | 88251      | 68.5  | 15403      | 61.5  | 28745      | 73.0  | 44103      | 68.4  |         |
| 3                      | 24450      | 19.0  | 3138       | 12.5  | 6203       | 15.8  | 15109      | 23.4  |         |
| Response time interval |            |       |            |       |            |       |            |       | <.001   |
| 0-3 min.               | 10289      | 8.0   | 2806       | 11.2  | 3491       | 8.9   | 3992       | 6.2   |         |
| 4-7 min.               | 66753      | 51.8  | 13845      | 55.3  | 21205      | 53.9  | 31703      | 49.2  |         |
| 8-11 min.              | 31796      | 24.7  | 5265       | 21.0  | 8992       | 22.8  | 17539      | 27.2  |         |
| 12-15 min.             | 11349      | 8.8   | 1696       | 6.8   | 3141       | 8.0   | 6512       | 10.1  |         |
| 15- min.               | 8701       | 6.8   | 1433       | 5.7   | 2537       | 6.4   | 4731       | 7.3   |         |
| Median (q1-q3)         | 7 (5-9)    |       | 6 (5-9)    |       | 6 (5-9)    |       | 7 (5-10)   |       |         |
| Scene time interval    |            |       |            |       |            |       |            |       | <.001   |
| 0-3 min.               | 21491      | 16.7  | 7590       | 30.3  | 8490       | 21.6  | 5411       | 8.4   |         |

|                         |          |      |          |      |          |      |          |      |       |
|-------------------------|----------|------|----------|------|----------|------|----------|------|-------|
| 4-7 min.                | 47572    | 36.9 | 10195    | 40.7 | 16479    | 41.9 | 20898    | 32.4 |       |
| 8-11 min.               | 34675    | 26.9 | 4490     | 17.9 | 8935     | 22.7 | 21250    | 33.0 |       |
| 12-15 min.              | 15072    | 11.7 | 1663     | 6.6  | 3379     | 8.6  | 10030    | 15.6 |       |
| 15- min.                | 10078    | 7.8  | 1107     | 4.4  | 2083     | 5.3  | 6888     | 10.7 |       |
| Median (q1-q3)          | 7 (5-10) |      | 5 (3-8)  |      | 6 (4-9)  |      | 8 (6-12) |      |       |
| Transport time interval |          |      |          |      |          |      |          |      | <.001 |
| 0-3 min.                | 19642    | 15.2 | 4617     | 18.4 | 5927     | 15.1 | 9098     | 14.1 |       |
| 4-7 min.                | 54292    | 42.1 | 10305    | 41.1 | 16460    | 41.8 | 27527    | 42.7 |       |
| 8-11 min.               | 25945    | 20.1 | 4631     | 18.5 | 7785     | 19.8 | 13529    | 21.0 |       |
| 12-15 min.              | 12641    | 9.8  | 2256     | 9.0  | 3878     | 9.9  | 6507     | 10.1 |       |
| 15- min.                | 16368    | 12.7 | 3236     | 12.9 | 5316     | 13.5 | 7816     | 12.1 |       |
| Median (q1-q3)          | 7 (4-11) |      | 6 (4-11) |      | 7 (4-11) |      | 7 (4-11) |      |       |
| Airway management       |          |      |          |      |          |      |          |      | <.001 |
| ETI                     | 3758     | 2.9  | 388      | 1.5  | 846      | 2.1  | 2524     | 3.9  |       |
| SGA                     | 6483     | 5.0  | 596      | 2.4  | 908      | 2.3  | 4979     | 7.7  |       |
| BVM                     | 80896    | 62.8 | 11146    | 44.5 | 23967    | 60.9 | 45783    | 71.0 |       |
| PV                      | 37751    | 29.3 | 12915    | 51.6 | 13645    | 34.7 | 11191    | 17.4 |       |
| Level of ED             |          |      |          |      |          |      |          |      | <.001 |
| Level 1                 | 13972    | 10.8 | 2407     | 9.6  | 4252     | 10.8 | 7313     | 11.3 |       |
| Level 2                 | 60469    | 46.9 | 10955    | 43.7 | 17515    | 44.5 | 31999    | 49.6 |       |
| Level 3                 | 46452    | 36.0 | 9668     | 38.6 | 14931    | 37.9 | 21853    | 33.9 |       |
| Level 4                 | 7995     | 6.2  | 2015     | 8.0  | 2668     | 6.8  | 3312     | 5.1  |       |
| Outcomes                |          |      |          |      |          |      |          |      |       |
| Prehospital ROSC        | 4722     | 3.7  | 243      | 1.0  | 837      | 2.1  | 3642     | 5.6  | <.001 |
| Survival to discharge   | 6621     | 5.1  | 851      | 3.4  | 1908     | 4.8  | 3862     | 6.0  | <.001 |
| Good CPC                | 3200     | 2.5  | 287      | 1.1  | 682      | 1.7  | 2231     | 3.5  | <.001 |

VF/VT: ventricular fibrillation/ ventricular tachycardia, PEA: pulseless electrical activity, CPR: cardiopulmonary resuscitation, ETI: endotracheal intubation, SGA: supraglottic airway, BVM: bag-valve mask ventilation, PV: passive oxygen ventilation, ED: emergency department, ROSC: return of spontaneous circulation, CPC: cerebral performance category



Table 2 Age- and gender-standardized rates by year

| Year | Total<br>N | Survival to discharge |     |     |        |     | Good CPC |     |     |        |     |
|------|------------|-----------------------|-----|-----|--------|-----|----------|-----|-----|--------|-----|
|      |            | Yes                   | CSR | SSR | 95% CI |     | Yes      | CSR | SSR | 95% CI |     |
| 2006 | 6677       | 200                   | 3.0 | 2.6 | 2.3    | 3.0 | 63       | 0.9 | 0.8 | 0.6    | 1.0 |
| 2007 | 7525       | 270                   | 3.6 | 3.2 | 2.8    | 3.6 | 92       | 1.2 | 1.1 | 0.9    | 1.3 |
| 2008 | 10843      | 381                   | 3.5 | 3.3 | 2.9    | 3.6 | 132      | 1.2 | 1.1 | 0.9    | 1.3 |
| 2009 | 11963      | 552                   | 4.6 | 4.3 | 3.9    | 4.7 | 174      | 1.5 | 1.3 | 1.1    | 1.5 |
| 2010 | 13472      | 607                   | 4.5 | 4.4 | 4.0    | 4.7 | 195      | 1.4 | 1.4 | 1.2    | 1.6 |
| 2011 | 13931      | 749                   | 5.4 | 5.4 | 5.1    | 5.8 | 313      | 2.2 | 2.3 | 2.0    | 2.5 |
| 2012 | 14326      | 829                   | 5.8 | 5.9 | 5.5    | 6.3 | 382      | 2.7 | 2.7 | 2.5    | 3.0 |
| 2013 | 15567      | 927                   | 6.0 | 6.2 | 5.8    | 6.6 | 485      | 3.1 | 3.3 | 3.0    | 3.6 |
| 2014 | 16923      | 1027                  | 6.1 | 6.7 | 6.3    | 7.1 | 648      | 3.8 | 4.3 | 4.0    | 4.6 |
| 2015 | 17661      | 1079                  | 6.1 | 6.9 | 6.5    | 7.4 | 716      | 4.1 | 4.7 | 4.4    | 5.1 |

CSR; crude survival rate

SSR; age- and gender-standardized survival rate

Table 3 Trend analysis on distribution of risk factors on outcomes according to year

| Variables         | All    | Year |      |       |       |       |       |       |       |       |       | P for trend* |
|-------------------|--------|------|------|-------|-------|-------|-------|-------|-------|-------|-------|--------------|
|                   |        | 2006 | 2007 | 2008  | 2009  | 2010  | 2011  | 2012  | 2013  | 2014  | 2015  |              |
| Total             | 128888 | 6677 | 7525 | 10843 | 11963 | 13472 | 13931 | 14326 | 15567 | 16923 | 17661 |              |
| Age               |        |      |      |       |       |       |       |       |       |       |       | <.001        |
| 15-39, years      | 5.4    | 7.7  | 7.4  | 7.1   | 6.7   | 6.0   | 4.7   | 4.9   | 4.7   | 4.4   | 4.0   |              |
| 40-59, years      | 26.0   | 29.7 | 29.7 | 29.7  | 28.6  | 26.8  | 25.5  | 25.9  | 25.1  | 23.1  | 22.1  |              |
| 60-79, years      | 46.1   | 46.8 | 46.8 | 46.2  | 46.3  | 46.8  | 47.0  | 46.2  | 45.7  | 45.2  | 44.9  |              |
| 80-, years        | 22.6   | 15.8 | 16.1 | 17.1  | 18.3  | 20.5  | 22.8  | 23.0  | 24.4  | 27.3  | 29.0  |              |
| Gender            |        |      |      |       |       |       |       |       |       |       |       | <.001        |
| Female            | 35.6   | 34.5 | 33.6 | 35.1  | 34.0  | 35.4  | 35.5  | 36.2  | 35.7  | 37.0  | 36.7  |              |
| Male              | 64.4   | 65.5 | 66.4 | 64.9  | 66.0  | 64.6  | 64.5  | 63.8  | 64.3  | 63.0  | 63.3  |              |
| Metropolis        |        |      |      |       |       |       |       |       |       |       |       | 0.497        |
| Non-metropolis    | 57.6   | 59.3 | 57.3 | 57.0  | 56.9  | 57.6  | 58.7  | 57.7  | 56.8  | 57.4  | 57.7  |              |
| Metropolis        | 42.4   | 40.7 | 42.7 | 43.0  | 43.1  | 42.4  | 41.3  | 42.3  | 43.2  | 42.6  | 42.3  |              |
| Place             |        |      |      |       |       |       |       |       |       |       |       | <.001        |
| Public            | 20.4   | 38.5 | 34.7 | 20.6  | 19.4  | 18.2  | 19.0  | 18.8  | 18.0  | 17.5  | 17.0  |              |
| Private           | 78.5   | 60.6 | 62.8 | 78.3  | 79.7  | 81.1  | 80.2  | 80.1  | 80.9  | 81.3  | 81.9  |              |
| Unknown           | 1.1    | 0.9  | 2.5  | 1.1   | 0.9   | 0.8   | 0.9   | 1.1   | 1.1   | 1.2   | 1.1   |              |
| Primary ECG       |        |      |      |       |       |       |       |       |       |       |       | <.001        |
| VF/pulseless VT   | 6.7    | 4.5  | 5.8  | 5.5   | 4.1   | 3.8   | 4.4   | 8.8   | 8.8   | 8.6   | 8.7   |              |
| PEA               | 5.6    | 2.4  | 3.1  | 4.7   | 4.1   | 4.6   | 5.3   | 6.4   | 6.8   | 6.6   | 7.8   |              |
| Asystole          | 87.7   | 93.1 | 91.1 | 89.8  | 91.8  | 91.5  | 90.3  | 84.8  | 84.3  | 84.7  | 83.5  |              |
| Witnessed         |        |      |      |       |       |       |       |       |       |       |       | <.001        |
| No                | 55.3   | 53.9 | 53.7 | 51.2  | 53.1  | 54.9  | 53.9  | 55.5  | 59.1  | 57.5  | 56.2  |              |
| Yes               | 44.7   | 46.1 | 46.3 | 48.8  | 46.9  | 45.1  | 46.1  | 44.5  | 40.9  | 42.5  | 43.8  |              |
| Bystander CPR     |        |      |      |       |       |       |       |       |       |       |       | <.001        |
| No                | 91.6   | 98.8 | 97.7 | 97.8  | 96.4  | 95.7  | 93.8  | 91.3  | 89.1  | 84.7  | 83.6  |              |
| Yes               | 8.4    | 1.2  | 2.3  | 2.2   | 3.6   | 4.3   | 6.2   | 8.7   | 10.9  | 15.3  | 16.4  |              |
| Season            |        |      |      |       |       |       |       |       |       |       |       | 0.338        |
| MAR.-MAY          | 25.4   | 24.8 | 24.9 | 24.3  | 25.6  | 26.1  | 25.7  | 24.6  | 25.4  | 25.3  | 26.4  |              |
| JUN-AUG           | 21.9   | 23.9 | 22.3 | 22.3  | 23.0  | 21.4  | 22.0  | 21.2  | 21.3  | 21.5  | 21.5  |              |
| SEP-NOV           | 17.1   | 16.9 | 17.1 | 17.7  | 17.2  | 17.1  | 16.5  | 17.2  | 17.5  | 17.1  | 16.5  |              |
| DEC-FEB           | 35.7   | 34.4 | 35.7 | 35.7  | 34.2  | 35.4  | 35.8  | 37.0  | 35.9  | 36.2  | 35.6  |              |
| Weekend           |        |      |      |       |       |       |       |       |       |       |       | 0.083        |
| Weekday           | 70.4   | 69.3 | 70.1 | 70.2  | 70.2  | 70.7  | 70.1  | 71.0  | 70.2  | 70.8  | 70.5  |              |
| Weekend           | 29.6   | 30.7 | 29.9 | 29.8  | 29.8  | 29.3  | 29.9  | 29.0  | 29.8  | 29.2  | 29.5  |              |
| Hour of the event |        |      |      |       |       |       |       |       |       |       |       | 0.000        |

|    |  |  |  |  |  |  |  |  |  |  |  |  |  |
|----|--|--|--|--|--|--|--|--|--|--|--|--|--|
| 1  |  |  |  |  |  |  |  |  |  |  |  |  |  |
| 2  |  |  |  |  |  |  |  |  |  |  |  |  |  |
| 3  |  |  |  |  |  |  |  |  |  |  |  |  |  |
| 4  |  |  |  |  |  |  |  |  |  |  |  |  |  |
| 5  |  |  |  |  |  |  |  |  |  |  |  |  |  |
| 6  |  |  |  |  |  |  |  |  |  |  |  |  |  |
| 7  |  |  |  |  |  |  |  |  |  |  |  |  |  |
| 8  |  |  |  |  |  |  |  |  |  |  |  |  |  |
| 9  |  |  |  |  |  |  |  |  |  |  |  |  |  |
| 10 |  |  |  |  |  |  |  |  |  |  |  |  |  |
| 11 |  |  |  |  |  |  |  |  |  |  |  |  |  |
| 12 |  |  |  |  |  |  |  |  |  |  |  |  |  |
| 13 |  |  |  |  |  |  |  |  |  |  |  |  |  |
| 14 |  |  |  |  |  |  |  |  |  |  |  |  |  |
| 15 |  |  |  |  |  |  |  |  |  |  |  |  |  |
| 16 |  |  |  |  |  |  |  |  |  |  |  |  |  |
| 17 |  |  |  |  |  |  |  |  |  |  |  |  |  |
| 18 |  |  |  |  |  |  |  |  |  |  |  |  |  |
| 19 |  |  |  |  |  |  |  |  |  |  |  |  |  |
| 20 |  |  |  |  |  |  |  |  |  |  |  |  |  |
| 21 |  |  |  |  |  |  |  |  |  |  |  |  |  |
| 22 |  |  |  |  |  |  |  |  |  |  |  |  |  |
| 23 |  |  |  |  |  |  |  |  |  |  |  |  |  |
| 24 |  |  |  |  |  |  |  |  |  |  |  |  |  |
| 25 |  |  |  |  |  |  |  |  |  |  |  |  |  |
| 26 |  |  |  |  |  |  |  |  |  |  |  |  |  |
| 27 |  |  |  |  |  |  |  |  |  |  |  |  |  |
| 28 |  |  |  |  |  |  |  |  |  |  |  |  |  |
| 29 |  |  |  |  |  |  |  |  |  |  |  |  |  |
| 30 |  |  |  |  |  |  |  |  |  |  |  |  |  |
| 31 |  |  |  |  |  |  |  |  |  |  |  |  |  |
| 32 |  |  |  |  |  |  |  |  |  |  |  |  |  |
| 33 |  |  |  |  |  |  |  |  |  |  |  |  |  |
| 34 |  |  |  |  |  |  |  |  |  |  |  |  |  |
| 35 |  |  |  |  |  |  |  |  |  |  |  |  |  |
| 36 |  |  |  |  |  |  |  |  |  |  |  |  |  |
| 37 |  |  |  |  |  |  |  |  |  |  |  |  |  |
| 38 |  |  |  |  |  |  |  |  |  |  |  |  |  |
| 39 |  |  |  |  |  |  |  |  |  |  |  |  |  |
| 40 |  |  |  |  |  |  |  |  |  |  |  |  |  |
| 41 |  |  |  |  |  |  |  |  |  |  |  |  |  |
| 42 |  |  |  |  |  |  |  |  |  |  |  |  |  |
| 43 |  |  |  |  |  |  |  |  |  |  |  |  |  |
| 44 |  |  |  |  |  |  |  |  |  |  |  |  |  |
| 45 |  |  |  |  |  |  |  |  |  |  |  |  |  |
| 46 |  |  |  |  |  |  |  |  |  |  |  |  |  |
| 47 |  |  |  |  |  |  |  |  |  |  |  |  |  |
| 48 |  |  |  |  |  |  |  |  |  |  |  |  |  |
| 49 |  |  |  |  |  |  |  |  |  |  |  |  |  |

1  
2  
3  
4  
5

|         |     |     |     |     |     |     |     |     |     |     |     |  |
|---------|-----|-----|-----|-----|-----|-----|-----|-----|-----|-----|-----|--|
| Level 4 | 6.2 | 8.5 | 8.0 | 7.8 | 7.2 | 8.4 | 4.8 | 4.8 | 4.3 | 5.6 | 5.7 |  |
|---------|-----|-----|-----|-----|-----|-----|-----|-----|-----|-----|-----|--|

6 VF/VT: ventricular fibrillation/ ventricular tachycardia, PEA: pulseless electrical activity, CPR: cardiopulmonary resuscitation, ETI: endotracheal  
7 intubation, SGA: supraglottic airway, BVM: bag-valve mask ventilation, PV: passive oxygen ventilation, ED: emergency department, ROSC: return of  
8 spontaneous circulation, CPC: cerebral performance category

9 \*P for trends were tested using the Cochran-Armitage test or Mantel-Haenszel Chi-square test.  
10  
11  
12  
13  
14  
15  
16  
17  
18  
19  
20  
21  
22  
23  
24  
25  
26  
27  
28  
29  
30  
31  
32  
33  
34  
35  
36  
37  
38  
39  
40  
41  
42  
43  
44  
45  
46  
47  
48  
49

Table 4. Multivariable logistic regression analysis for outcomes of study phase comparing with control phase

| Outcomes              | Group   | Total<br>N | Outcome |     | Model 1 |        |      | Model 2 |        |      |
|-----------------------|---------|------------|---------|-----|---------|--------|------|---------|--------|------|
|                       |         |            | n       | %   | AOR     | 95% CI |      | AOR     | 95% CI |      |
| Good CPC              |         |            |         |     |         |        |      |         |        |      |
|                       | Control | 25045      | 287     | 1.1 | 1.00    |        |      | 1.00    |        |      |
|                       | Phase 1 | 39366      | 682     | 1.7 | 2.11    | 1.82   | 2.45 | 2.22    | 1.91   | 2.59 |
|                       | Phase 2 | 64477      | 2231    | 3.5 | 3.13    | 2.74   | 3.58 | 3.32    | 2.87   | 3.84 |
| Survival to discharge |         |            |         |     |         |        |      |         |        |      |
|                       | Control | 25045      | 851     | 3.4 | 1.00    |        |      | 1.00    |        |      |
|                       | Phase 1 | 39366      | 1908    | 4.8 | 1.85    | 1.70   | 2.03 | 1.95    | 1.77   | 2.13 |
|                       | Phase 2 | 64477      | 3862    | 6.0 | 1.87    | 1.72   | 2.03 | 2.09    | 1.91   | 2.29 |
| Prehospital ROSC      |         |            |         |     |         |        |      |         |        |      |
|                       | Control | 25045      | 243     | 1.0 | 1.00    |        |      | 1.00    |        |      |
|                       | Phase 1 | 39366      | 837     | 2.1 | 2.84    | 2.45   | 3.29 | 2.84    | 2.44   | 3.31 |
|                       | Phase 2 | 64477      | 3642    | 5.6 | 6.54    | 5.71   | 7.49 | 5.83    | 5.06   | 6.73 |

AOR: adjusted odd ratio, 95% CI: 95% confidence interval

Good CPC: cerebral performance scale 1 or 2

ROSC: return of spontaneous circulation

Model 1: adjusted for gender, age group, metropolis, place of the event, witness, primary ECG, date and time of event (season, weekend, hour).

Model 2: adjusted for gender, age group, metropolis, place of the event, witness, primary ECG, date and time of event (season, weekend, hour), level of emergency medical technician, number of ambulance crew, response time interval, scene time interval, transport time interval, airway management method, level of emergency department transported..

Table 5 Interaction analysis for comparison of the effect size by study phase according to bystander cardiopulmonary resuscitation

| Outcome               | Group   | Bystander CPR (-) |        |      | Bystander CPR (+) |        |      | P value for interaction |
|-----------------------|---------|-------------------|--------|------|-------------------|--------|------|-------------------------|
|                       |         | AOR               | 95% CI |      | AOR               | 95% CI |      |                         |
| Good CPC              |         |                   |        |      |                   |        |      |                         |
|                       | Control | 1.00              |        |      | 1.00              |        |      |                         |
|                       | Phase 1 | 1.93              | 1.64   | 2.26 | 4.41              | 2.49   | 7.81 | 0.006                   |
|                       | Phase 2 | 2.67              | 2.30   | 3.11 | 5.27              | 3.06   | 9.08 | 0.018                   |
| Survival to discharge |         |                   |        |      |                   |        |      |                         |
|                       | Control | 1.00              |        |      | 1.00              |        |      |                         |
|                       | Phase 1 | 1.82              | 1.65   | 2.00 | 2.81              | 1.91   | 4.14 | 0.032                   |
|                       | Phase 2 | 1.82              | 1.66   | 2.01 | 2.64              | 1.83   | 3.80 | 0.054                   |
| Prehospital ROSC      |         |                   |        |      |                   |        |      |                         |
|                       | Control | 1.00              |        |      | 1.00              |        |      |                         |
|                       | Phase 1 | 2.57              | 2.19   | 3.01 | 4.05              | 2.31   | 7.10 | 0.124                   |
|                       | Phase 2 | 5.27              | 4.54   | 6.11 | 5.59              | 3.27   | 9.57 | 0.831                   |

AOR: adjusted odd ratio, 95% CI: 95% confidence interval

Good CPC: cerebral performance scale 1 or 2

ROSC: return of spontaneous circulation

Adjusted for gender, age group, metropolis, place of the event, witness, primary ECG, date and time of event (season, weekend, hour), level of emergency medical technician, number of ambulance crew, response time interval, scene time interval, transport time interval, airway management method, level of emergency department transported, bystander cardiopulmonary resuscitation (CPR), and interaction term (phase\*bystander CPR).

1  
2  
3  
4  
5  
6  
7  
8  
9  
10  
11  
12  
13  
14  
15  
16  
17  
18  
19  
20  
21  
22  
23  
24  
25  
26  
27  
28  
29  
30  
31  
32  
33  
34  
35  
36  
37  
38  
39  
40  
41  
42  
43  
44  
45  
46  
47  
48  
49  
50  
51  
52  
53  
54  
55  
56  
57  
58  
59  
60

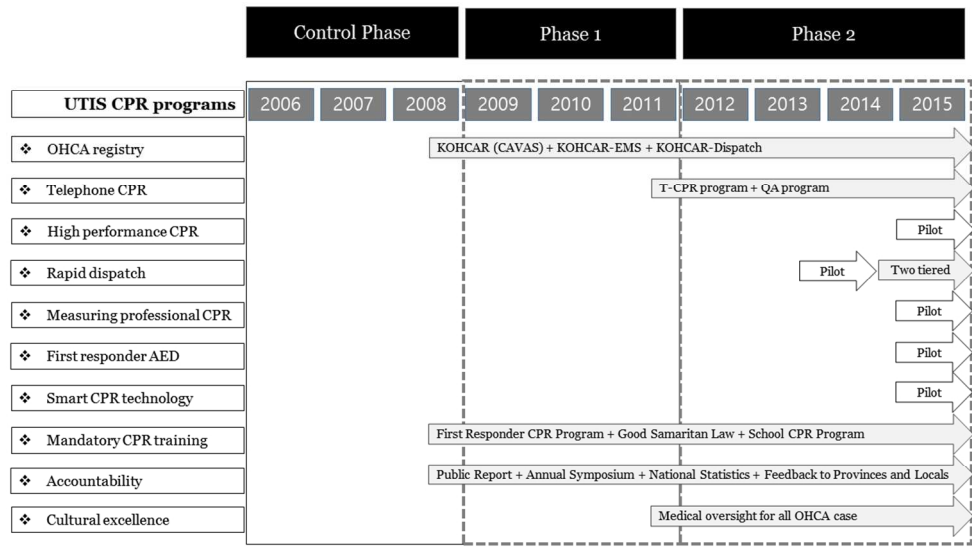

Figure 1 National Implementation of Utstein Ten-step Implementation Strategy by study period

CPR: cardiopulmonary resuscitation  
 AED: automatic external defibrillation  
 KOHCAR: Korea out-of-hospital cardiac arrest registry  
 EMS: emergency medical services  
 T-CPR: telephone CPR  
 OA: quality assurance  
 OHCA: out-of-hospital cardiac arrest

338x190mm (96 x 96 DPI)

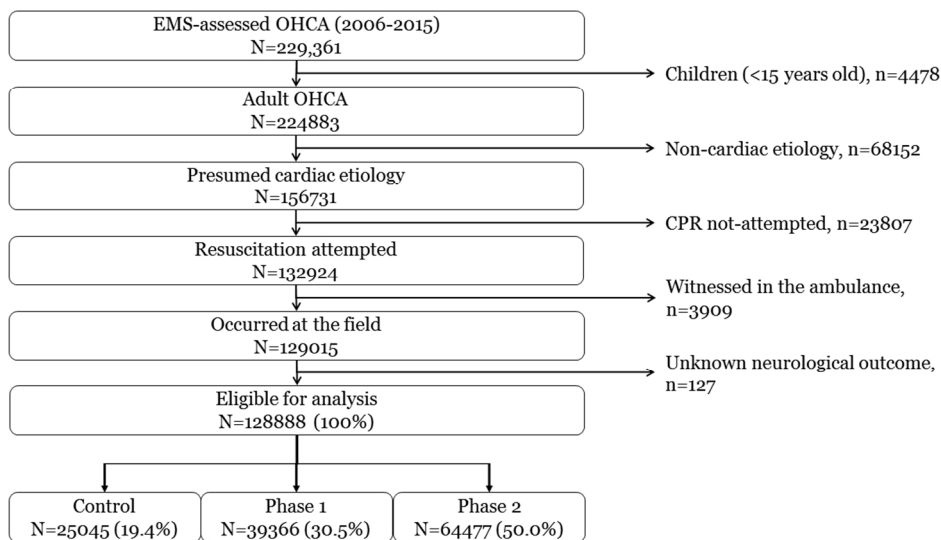

Figure 2 Study subjects  
 EMS: emergency medical service  
 OHCA: out-of-hospital cardiac arrest  
 CPR: cardiopulmonary resuscitation

338x190mm (96 x 96 DPI)

view only



1  
2  
3  
4  
5  
6  
7  
8  
9  
10  
11  
12  
13  
14  
15  
16  
17  
18  
19  
20  
21  
22  
23  
24  
25  
26  
27  
28  
29  
30  
31  
32  
33  
34  
35  
36  
37  
38  
39  
40  
41  
42  
43  
44  
45  
46  
47  
48  
49  
50  
51  
52  
53  
54  
55  
56  
57  
58  
59  
60

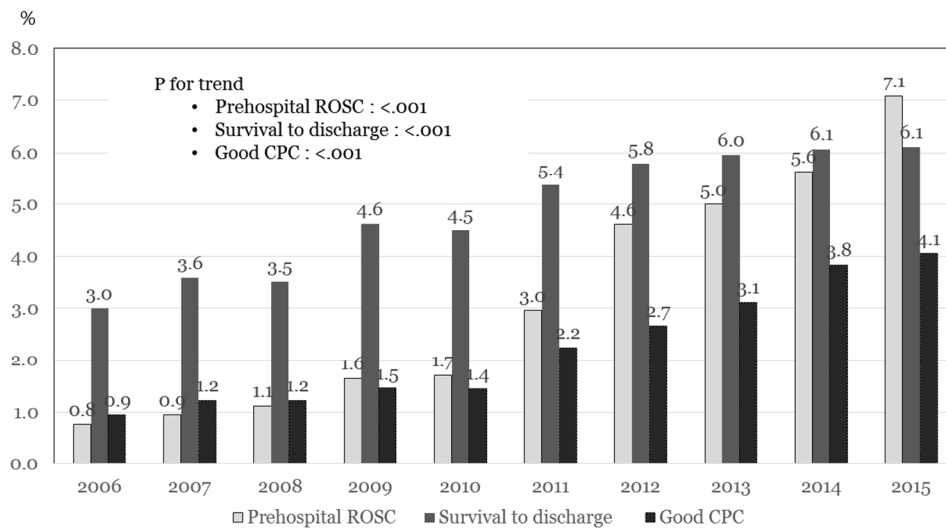

Figure 3 Longitudinal trend of outcomes in out-of-hospital cardiac arrest in Korea  
 ROSC: return of spontaneous circulation  
 CPC: cerebral performance scale

338x190mm (96 x 96 DPI)

view only

## Appendix 1. Utstein ten-steps implementation strategy (UTIS)

Step 1. Do you have a **community-based cardiac arrest registry**?

- No
- Yes, started in (□□□□)

If yes, please check the implementation status according to the notes below:

- Minimal status is defined as the registry has *NEITHER* quality assurance program *NOR* sufficient information on 2014 Utstein template information
- Moderate status is defined as the registry has *EITHER* quality assurance program *OR* sufficient information on 2014 Utstein template information
- Full status is defined as the registry has *BOTH* quality assurance program *AND* sufficient information on 2014 Utstein template information

*Notes:*

※ Community-based cardiac arrest registry means that the registry has been continuously maintained with regularity and basic information on OHCA and CPR covering the whole community.

※ Quality assurance program includes 1) standard data dictionary for the variables 2) regular data quality management and 3) education and training for data coordinator and providers.

※ Sufficient information on 2014 Utstein template includes the registry has most factors on system, individual, structure, process, and outcomes.

Step 2. Do you have a **telephone CPR program**?

- No
- Yes, started in (□□□□)

If yes, please check the implementation status according to the notes below:

- Minimal status is defined as the registry has *NEITHER* quality assurance program *NOR* telephone CPR registry
- Moderate status is defined as the registry has *EITHER* quality assurance program *OR* telephone CPR registry
- Full status is defined as the registry has *BOTH* quality assurance program *AND* telephone

## CPR registry

*Notes*

- ※ Telephone CPR program means that a community dispatch center provides dispatcher-assisted CPR instruction program when a call is recognized as a case of cardiac arrest.
- ※ Quality assurance program includes 1) dispatch protocol, 2) dispatcher training, 3) audio-tape review and feedback.
- ※ Telephone CPR registry includes the caller information, dispatch time variable, process variable, and CPR instruction.

Step 3. Do you have a **high performance CPR program**?

- No
- Yes, started in (□□□□)

If yes, please check the implementation status according to the notes below:

- Minimal status is defined as the registry has *NEITHER* high performance CPR training program *NOR* quality assurance program using an objective measurement tool.
- Moderate status is defined as the registry has *EITHER* high performance CPR training program *NOR* quality assurance program using an objective measurement tool.
- Full status is defined as the registry has *BOTH* high performance CPR training program *AND* quality assurance program using an objective measurement tool.

*Notes*

- ※ High performance (HP) CPR program means that the community encourages providers to perform HP CPR on 1) correct hand position, 2) compression rate of 100-120 beats per minute, 3) depth of compression of 2 inches (5-6 cm), 4) full recoil on the upstroke, 5) 50:50 duty cycles, 6) ventilations of one second each, 7) minimal interruptions of CPR (no pause to exceed 10 seconds), and 8) intubation and IV start without pausing chest compressions.
- ※ High performance CPR training includes the system provides a special education and team training with providers regularly.
- ※ Quality assurance program includes the regular review of team CPR and get feedback to providers.

1  
2  
3  
4  
5  
6 Step 4. Do you have a **rapid dispatch program**?

- 7  
8  No  
9  
10  Yes, started in (□□□□)

11 If yes, please check the implementation status according to the notes below:

- 12  
13  Minimal status is defined as the rapid dispatch program has *NEITHER* rapid dispatch  
14 indication and protocol *NOR* quality assurance program.  
15  
16  Moderate status is defined as the rapid dispatch program has *EITHER* rapid dispatch  
17 indication and protocol *OR* quality assurance program.  
18  
19  Full status is defined as the rapid dispatch program has *BOTH* rapid dispatch indication and  
20 protocol *AND* quality assurance program.  
21  
22  
23

24 *Notes*

- 25  
26 ※ Rapid dispatch program means that the community sends available vehicles and services  
27 responding to OHCA quickly within a critical time interval (such as 60 seconds)  
28  
29  
30 ※ Rapid dispatch indication and protocol includes target emergency condition and dispatch  
31 protocol for available vehicles and providers such as tiered response to shorten the time  
32 process.  
33  
34  
35  
36 ※ Quality assurance program includes the regular training and education of dispatcher, regular  
37 review of dispatch record, and on-going feedback to the providers.  
38  
39

40  
41 Step 5. Do you have a **measurement program of professional resuscitation** using high  
42 technology device?  
43

- 44  
45  No  
46  
47  Yes, started in (□□□□)

48 If yes, please check the implementation status according to the notes below:

- 49  
50  Minimal status is defined as the professional CPR measurement has *NEITHER* high  
51 technology devices *NOR* quality assurance program.  
52  
53  Moderate status is defined as the professional CPR measurement has *EITHER* high  
54 technology devices *OR* quality assurance program.  
55  
56  Full status is defined as the professional CPR measurement has *BOTH* high technology  
57  
58  
59  
60

devices *AND* quality assurance program.

*Notes*

- ※ The professional CPR measurement means that the providers use the high technology defibrillator devices which can provide information on a full range of CPR quality.
- ※ High technology devices include function of measuring depth, rate, pause, no-flow time objectively and continuously and function for audio-recording system, memory, and data downloading.
- ※ Quality assurance program includes the data collection from devices, analysis, providing feedback with providers, regularly.

Step 6. Do you have a **first responder (policemen or safety guards) AED program?**

- No
- Yes, started in (□□□□)

If yes, please check the implementation status according to the notes below:

- Minimal status is defined as the first responder AED program has *NEITHER* education and training on first responder AED *NOR* quality assurance program of first responder defibrillation.
- Moderate status is defined as the first responder AED program has *EITHER* education and training on first responder AED *OR* quality assurance program of first responder defibrillation.
- Full status is defined as the first responder AED program has *BOTH* education and training on first responder AED *AND* quality assurance program of first responder defibrillation.

*Notes*

- ※ The first responder AED program means that the community encourages policemen or safety guards to use AED by law or voluntary-based.
- ※ The first responder AED training/ education includes a regular education and training program on AED use and response for police and safety guards.
- ※ Quality assurance program includes the data collection from devices and analysis of first responder AED use and providing feedback with the first responders, regularly.

1  
2  
3  
4 Step 7. Do you use a **smart technology to activate layperson to provide CPR and use public**  
5  
6 **access defibrillator (PAD)?**

- 7  
8  No  
9  
10  Yes, started in (□□□□)

11 If yes, please check the implementation status according to the notes below:

- 12  
13  Minimal status is defined as smart technology program for CPR and PAD has *NEITHER* an  
14 advanced technology for geographical information *NOR* an activation program for layperson  
15 CPR and PAD.  
16  
17  Moderate status is defined as smart technology program for CPR and PAD has *EITHER* an  
18 advanced technology for geographical information *OR* an activation program for layperson  
19 CPR and PAD.  
20  
21  Full status is defined as smart technology program for CPR and PAD has *BOTH* an advanced  
22 technology for geographical information *AND* an activation program for layperson CPR and  
23 PAD.  
24  
25  
26  
27  
28

29  
30 *Notes*

- 31  
32 ※ Smart technology program for CPR and PAD means that the community has program activate  
33 lay person to provide CPR and defibrillation using PAD via geographic information and  
34 activation program of layperson volunteer.  
35  
36  
37 ※ An advanced technology for geographical information includes special geographic information  
38 technology to let layperson identify the location of OHCA and the nearest PAD.  
39  
40  
41 ※ The activation of layperson for CPR and PAD includes the dispatch centers activate layperson  
42 volunteer for providing CPR and defibrillation with OHCA located in the nearest area.  
43  
44  
45

46  
47 Step 8. Do you have a **mandatory CPR training** in schools and other community areas in addition  
48 to first responders?

- 49  
50  No  
51  
52  Yes, started in (□□□□)

53  
54 If yes, please check the implementation status according to the notes below:

- 55  
56  Minimal status is defined as the mandatory CPR training covers *NEITHER* school *NOR* the  
57 other areas such as driver license applicants.  
58  
59  
60

- 1  
2  
3  
4  Moderate status is defined as the mandatory CPR training covers *EITHER* school *OR* the  
5 other areas such as driver license applicants.  
6  
7  Full status is defined as the mandatory CPR training covers *BOTH* school *AND* the other  
8 areas such as driver license applicants.  
9  
10

11 *Notes*

- 12  
13 ※ The mandatory CPR training means the community has law for obligatory CPR training in  
14 schools and other areas such as driver license applicants.  
15  
16  
17 ※ The mandatory school CPR includes regular program for CPR training for students and  
18 teachers based on an Act, Law, or Regulation.  
19  
20  
21 ※ The mandatory training program for other areas includes obligatory training for driver license  
22 applicants.  
23  
24  
25  
26

27 Step 9. Do you think your community has an **accountability on OHCA and CPR** outcomes?

- 28  No  
29  
30  Yes, started in (□□□□)  
31

32 If yes, please check the implementation status according to the notes below:

- 33  
34  Minimal status is defined when *NEITHER* the community reports OHCA information and  
35 CPR outcomes to the public annually *NOR* the community organizations share the  
36 information sufficiently.  
37  
38  Moderate status is defined when *EITHER* the community reports OHCA information and  
39 CPR outcomes to the public annually *OR* the community organizations share the information  
40 sufficiently.  
41  
42  Full status is defined when *BOTH* the community reports OHCA information and CPR  
43 outcomes to the public annually *AND* the community organizations share the information  
44 sufficiently.  
45  
46  
47  
48  
49  
50

51 *Notes*

- 52  
53 ※ The accountability on OHCA and CPR outcomes means the community reports OHCA  
54 information and CPR outcomes to the public annually and involved organizations share the  
55 information sufficiently.  
56  
57  
58  
59  
60

- 1  
2  
3  
4  
5  
6  
7  
8  
9  
10  
11  
12  
13
- ※ Public reports includes the annual incidence, outcomes by rhythms, locations, bystander CPR, PAD use, and response time.
  - ※ Information sharing includes the organizations communicate with each other, and exchange information and data for CPR program.

14 Step 10. Do you think your community has a **cultural excellence** for improving CPR outcomes?

- 15  
16  
17  
18
- No
  - Yes, started in (□□□□)

19 If yes, please check the implementation status according to the notes below:

- 20  
21  
22  
23  
24  
25  
26  
27  
28  
29  
30  
31
- Minimal status is defined when *NEITHER* the medical directors play the key role for system development *NOR* host CPR-related meetings regularly.
  - Moderate status is defined when *EITHER* the medical directors play the key role for system development *OR* host CPR-related meetings regularly.
  - Full status is defined when *BOTH* the medical directors play the key role for system development *AND* host CPR-related meetings regularly.

32 *Notes*

- 33  
34  
35  
36  
37  
38  
39  
40  
41  
42  
43  
44  
45  
46  
47  
48  
49  
50  
51  
52  
53  
54  
55  
56  
57  
58  
59  
60
- ※ The cultural excellence means the medical directors are actively engaged in system development, protocol, education, and quality assurance program and meet with community leaders regularly for communication, collaboration, and coordination to establish the best practice.
  - ※ The role of medical directors includes system development, education and training, certification, and quality assurance program.
  - ※ Leadership meeting indicates the meeting of organization leaders to meet and communicate with each other regularly for improving CPR outcomes.



## STROBE Statement—checklist of items that should be included in reports of observational studies

|                              | Item No | Recommendation                                                                                                                                                                                                                                                                                                                                                                                                                                                         | Page |
|------------------------------|---------|------------------------------------------------------------------------------------------------------------------------------------------------------------------------------------------------------------------------------------------------------------------------------------------------------------------------------------------------------------------------------------------------------------------------------------------------------------------------|------|
| <b>Title and abstract</b>    | 1       | (a) Indicate the study's design with a commonly used term in the title or the abstract                                                                                                                                                                                                                                                                                                                                                                                 | P1   |
|                              |         | (b) Provide in the abstract an informative and balanced summary of what was done and what was found                                                                                                                                                                                                                                                                                                                                                                    | P3   |
| <b>Introduction</b>          |         |                                                                                                                                                                                                                                                                                                                                                                                                                                                                        |      |
| Background/rationale         | 2       | Explain the scientific background and rationale for the investigation being reported                                                                                                                                                                                                                                                                                                                                                                                   | P5   |
| Objectives                   | 3       | State specific objectives, including any prespecified hypotheses                                                                                                                                                                                                                                                                                                                                                                                                       | P5   |
| <b>Methods</b>               |         |                                                                                                                                                                                                                                                                                                                                                                                                                                                                        |      |
| Study design                 | 4       | Present key elements of study design early in the paper                                                                                                                                                                                                                                                                                                                                                                                                                | P5   |
| Setting                      | 5       | Describe the setting, locations, and relevant dates, including periods of recruitment, exposure, follow-up, and data collection                                                                                                                                                                                                                                                                                                                                        | P6   |
| Participants                 | 6       | (a) <i>Cohort study</i> —Give the eligibility criteria, and the sources and methods of selection of participants. Describe methods of follow-up<br><i>Case-control study</i> —Give the eligibility criteria, and the sources and methods of case ascertainment and control selection. Give the rationale for the choice of cases and controls<br><i>Cross-sectional study</i> —Give the eligibility criteria, and the sources and methods of selection of participants | P7   |
|                              |         | (b) <i>Cohort study</i> —For matched studies, give matching criteria and number of exposed and unexposed<br><i>Case-control study</i> —For matched studies, give matching criteria and the number of controls per case                                                                                                                                                                                                                                                 |      |
| Variables                    | 7       | Clearly define all outcomes, exposures, predictors, potential confounders, and effect modifiers. Give diagnostic criteria, if applicable                                                                                                                                                                                                                                                                                                                               | P8   |
| Data sources/<br>measurement | 8*      | For each variable of interest, give sources of data and details of methods of assessment (measurement). Describe comparability of assessment methods if there is more than one group                                                                                                                                                                                                                                                                                   | P6   |
| Bias                         | 9       | Describe any efforts to address potential sources of bias                                                                                                                                                                                                                                                                                                                                                                                                              | P8   |
| Study size                   | 10      | Explain how the study size was arrived at                                                                                                                                                                                                                                                                                                                                                                                                                              | P9   |
| Quantitative variables       | 11      | Explain how quantitative variables were handled in the analyses. If applicable, describe which groupings were chosen and why                                                                                                                                                                                                                                                                                                                                           | P9   |
| Statistical methods          | 12      | (a) Describe all statistical methods, including those used to control for confounding                                                                                                                                                                                                                                                                                                                                                                                  | P9   |
|                              |         | (b) Describe any methods used to examine subgroups and interactions                                                                                                                                                                                                                                                                                                                                                                                                    | P9   |
|                              |         | (c) Explain how missing data were addressed                                                                                                                                                                                                                                                                                                                                                                                                                            | P9   |
|                              |         | (d) <i>Cohort study</i> —If applicable, explain how loss to follow-up was addressed<br><i>Case-control study</i> —If applicable, explain how matching of cases and controls was addressed<br><i>Cross-sectional study</i> —If applicable, describe analytical methods taking account of sampling strategy                                                                                                                                                              | P9   |
|                              |         | (e) Describe any sensitivity analyses                                                                                                                                                                                                                                                                                                                                                                                                                                  |      |

Continued on next page

| <b>Results</b>           |     |                                                                                                                                                                                                                                                                                                                                                                                                               | <b>Page</b>      |
|--------------------------|-----|---------------------------------------------------------------------------------------------------------------------------------------------------------------------------------------------------------------------------------------------------------------------------------------------------------------------------------------------------------------------------------------------------------------|------------------|
| Participants             | 13* | (a) Report numbers of individuals at each stage of study—eg numbers potentially eligible, examined for eligibility, confirmed eligible, included in the study, completing follow-up, and analysed<br>(b) Give reasons for non-participation at each stage<br>(c) Consider use of a flow diagram                                                                                                               | P10<br><br>Fig 1 |
| Descriptive data         | 14* | (a) Give characteristics of study participants (eg demographic, clinical, social) and information on exposures and potential confounders<br>(b) Indicate number of participants with missing data for each variable of interest<br>(c) <i>Cohort study</i> —Summarise follow-up time (eg, average and total amount)                                                                                           | P10<br>Table 1   |
| Outcome data             | 15* | <i>Cohort study</i> —Report numbers of outcome events or summary measures over time<br><i>Case-control study</i> —Report numbers in each exposure category, or summary measures of exposure<br><i>Cross-sectional study</i> —Report numbers of outcome events or summary measures                                                                                                                             | P10              |
| Main results             | 16  | (a) Give unadjusted estimates and, if applicable, confounder-adjusted estimates and their precision (eg, 95% confidence interval). Make clear which confounders were adjusted for and why they were included<br>(b) Report category boundaries when continuous variables were categorized<br>(c) If relevant, consider translating estimates of relative risk into absolute risk for a meaningful time period | P11              |
| Other analyses           | 17  | Report other analyses done—eg analyses of subgroups and interactions, and sensitivity analyses                                                                                                                                                                                                                                                                                                                |                  |
| <b>Discussion</b>        |     |                                                                                                                                                                                                                                                                                                                                                                                                               |                  |
| Key results              | 18  | Summarise key results with reference to study objectives                                                                                                                                                                                                                                                                                                                                                      | P11              |
| Limitations              | 19  | Discuss limitations of the study, taking into account sources of potential bias or imprecision. Discuss both direction and magnitude of any potential bias                                                                                                                                                                                                                                                    | P13              |
| Interpretation           | 20  | Give a cautious overall interpretation of results considering objectives, limitations, multiplicity of analyses, results from similar studies, and other relevant evidence                                                                                                                                                                                                                                    | P12              |
| Generalisability         | 21  | Discuss the generalisability (external validity) of the study results                                                                                                                                                                                                                                                                                                                                         | P13              |
| <b>Other information</b> |     |                                                                                                                                                                                                                                                                                                                                                                                                               |                  |
| Funding                  | 22  | Give the source of funding and the role of the funders for the present study and, if applicable, for the original study on which the present article is based                                                                                                                                                                                                                                                 | P15              |

\*Give information separately for cases and controls in case-control studies and, if applicable, for exposed and unexposed groups in cohort and cross-sectional studies.

**Note:** An Explanation and Elaboration article discusses each checklist item and gives methodological background and published examples of transparent reporting. The STROBE checklist is best used in conjunction with this article (freely available on the Web sites of PLoS Medicine at <http://www.plosmedicine.org/>, Annals of Internal Medicine at <http://www.annals.org/>, and Epidemiology at <http://www.epidem.com/>). Information on the STROBE Initiative is available at [www.strobe-statement.org](http://www.strobe-statement.org).

# BMJ Open

## Effect of National Implementation of Utstein Recommendation from the Global Resuscitation Alliance on Ten Steps to improve Outcomes from Out-of-Hospital Cardiac Arrest: A Ten-Year Observational Study in Korea

|                                 |                                                                                                                                                                                                                                                                                                                                                                                                                                                                                                                                                                                                                                                                                                                                                                      |
|---------------------------------|----------------------------------------------------------------------------------------------------------------------------------------------------------------------------------------------------------------------------------------------------------------------------------------------------------------------------------------------------------------------------------------------------------------------------------------------------------------------------------------------------------------------------------------------------------------------------------------------------------------------------------------------------------------------------------------------------------------------------------------------------------------------|
| Journal:                        | <i>BMJ Open</i>                                                                                                                                                                                                                                                                                                                                                                                                                                                                                                                                                                                                                                                                                                                                                      |
| Manuscript ID                   | bmjopen-2017-016925.R1                                                                                                                                                                                                                                                                                                                                                                                                                                                                                                                                                                                                                                                                                                                                               |
| Article Type:                   | Research                                                                                                                                                                                                                                                                                                                                                                                                                                                                                                                                                                                                                                                                                                                                                             |
| Date Submitted by the Author:   | 17-Jun-2017                                                                                                                                                                                                                                                                                                                                                                                                                                                                                                                                                                                                                                                                                                                                                          |
| Complete List of Authors:       | Kim, Young Taek; Korea Centers for Disease Control and Prevention, Division of Chronic Disease Management<br>Shin, Sang Do; Seoul National University Hospital, Department of Emergency Medicine<br>Hong, Sung Ok; Korea Centers for Disease Control and Prevention<br>Ahn, Ki Ok; Seonam University College of Medicine Myongji Hospital<br>Ro, Young Sun; Seoul National University Hospital Biomedical Research Institute, Laboratory of Emergency Medical Services<br>Song, Kyoung Jun; Seoul National University College of Medicine, Department of Emergency Medicine<br>Hong, Ki Jeong; Seoul National University College of Medicine, Emergency Medicine; Seoul National University Seoul Metropolitan Government Boramae Medical Center, Emergency Medicine |
| <b>Primary Subject Heading</b>: | Emergency medicine                                                                                                                                                                                                                                                                                                                                                                                                                                                                                                                                                                                                                                                                                                                                                   |
| Secondary Subject Heading:      | Public health                                                                                                                                                                                                                                                                                                                                                                                                                                                                                                                                                                                                                                                                                                                                                        |
| Keywords:                       | Out-of-hospital cardiac arrest, Cardiopulmonary resuscitation, National health policy, Outcomes                                                                                                                                                                                                                                                                                                                                                                                                                                                                                                                                                                                                                                                                      |
|                                 |                                                                                                                                                                                                                                                                                                                                                                                                                                                                                                                                                                                                                                                                                                                                                                      |

SCHOLARONE™  
Manuscripts

## Title

1  
2  
3  
4  
5  
6  
7  
8  
9  
10  
11  
12  
13  
14  
15  
16  
17  
18  
19  
20  
21  
22  
23  
24  
25  
26  
27  
28  
29  
30  
31  
32  
33  
34  
35  
36  
37  
38  
39  
40  
41  
42  
43  
44  
45  
46  
47  
48  
49  
50  
51  
52  
53  
54  
55  
56  
57  
58  
59  
60

1. Title: Effect of National Implementation of Utstein Recommendation from the Global Resuscitation Alliance on Ten Steps to improve Outcomes from Out-of-Hospital Cardiac Arrest: A Ten-Year Observational Study in Korea

2. Running title: Utstein Ten-step CPR Programs and Outcomes

3. Authors

Young Taek Kim, MD, PhD

Korea Centers for Disease Control and Prevention

Email: [ruyoung@cdc.go.kr](mailto:ruyoung@cdc.go.kr)

Sang Do Shin, MD, PhD

Department of Emergency Medicine, Seoul National University College of Medicine

Email: [sdshin@snu.ac.kr](mailto:sdshin@snu.ac.kr)

Sung Ok Hong, PhD

Korea Centers for Disease Control and Prevention

Email: [soh822@hanmail.net](mailto:soh822@hanmail.net)

Ki Ok Ahn, MD, PhD

Laboratory of Emergency Medical Services, Seoul National University Hospital

Email: [arendt@gmail.com](mailto:arendt@gmail.com)

Young Sun Ro, MD, PhD

Laboratory of Emergency Medical Services, Seoul National University Hospital

Email: [ro.youngsun@gmail.com](mailto:ro.youngsun@gmail.com)

Kyoung Jun Song, MD, PhD

Department of Emergency Medicine, Seoul National University College of Medicine

Email: [skciva@gmail.com](mailto:skciva@gmail.com)

Ki Jeong Hong, MD, PhD

Department of Emergency Medicine, Seoul National University Boramae Medical Center

Email: [emkjhong@gmail.com](mailto:emkjhong@gmail.com)

4. Word count

Number: 3922 (excluding abstract, references, tables, and figures)

1  
2  
3  
4 5. Acknowledgements

5  
6 This study was supported by the National Emergency Management Agency of Korea and the  
7  
8 Korea Centers for Disease Control and Prevention (CDC). The study was funded by the Korea  
9  
10 CDC (2011-2015) (Grant No.: 2011- Grant for Private Support Program; 2012-E33010-00; 2013-  
11  
12 E33015-00; 2014-E33011-00; 2015-Grant for Private Support Program).

13 6. Corresponding author: Sang Do Shin MD, PhD (Corresponding author)

14  
15 Address: Department of Emergency Medicine, Seoul National University Hospital,  
16  
17 101 Daehak-Ro, Jongno-Gu, Seoul 110-744, Korea

18  
19 Phone: +82-2-2072-3257

20  
21 FAX: +82-2-741-7855

22  
23 E-mail: shinsangdo@gmail.com

24 7. Keywords

25  
26 Out-of-hospital cardiac arrest, Cardiopulmonary resuscitation, National health policy, Outcomes  
27  
28  
29  
30  
31  
32  
33  
34  
35  
36  
37  
38  
39  
40  
41  
42  
43  
44  
45  
46  
47  
48  
49  
50  
51  
52  
53  
54  
55  
56  
57  
58  
59  
60

## Abstract

## Objectives

The Utstein ten-step implementation strategy (UTIS) proposed by the Global Resuscitation Alliance, a bundle of community cardiopulmonary resuscitation (CPR) programs to improve outcomes after out-of-hospital cardiac arrests (OHCAs), has been developed. However, it is not documented whether UTIS programs are associated with better outcomes or not. The study aimed to test the association between the UTIS program and better outcomes after OHCA.

## Methods

The study was a before- and after-intervention study. Adults OHCAs treated by emergency medical service (EMS) from 2006 to 2015 in Korea were collected, excluding patients witnessed by ambulance personnel and without outcomes. Phase 1(2009-2011) after implementing three programs (national OHCA registry, obligatory CPR education, and public report of OHCA outcomes), and phase 2(2012-2015) after implementing two programs (telephone-assisted CPR and EMS quality assurance program) were compared with the control period (2006-2008) when no UTIS program were implemented. The primary outcome was good neurological recovery (cerebral performance scale 1 or 2). We tested the association between the phases and outcomes, adjusting for confounders using a multivariate logistic regression model to calculate adjusted odds ratios (AORs) with 95% confidence intervals (CIs).

## Results

A total of 128,888 eligible patients were analyzed. The control, phase 1, and phase 2 study groups were 19.4%, 30.5%, and 50.0% of the whole, respectively. There were significant changes in pre-hospital ROSC (0.8% in 2006 and 7.1% in 2015), survival to discharge (3.0% in 2006 and 6.1% in 2015), and good neurological recovery (1.2% in 2006 and 4.1% in 2015). The AORs (95% CIs) for good neurological recovery were 1.82 (1.53-2.15) or phase 1 and 2.21 (1.78-2.75) for phase 2 compared with control phase.

## Conclusion

The national implementation of the five UTIS programs was significantly associated with better OHCA outcomes in Korea.

1  
2  
3  
4 Article summary

5  
6 Strengths and limitations of this study

- 7  
8  
9  
10  
11  
12  
13  
14  
15  
16  
17  
18  
19  
20  
21  
22  
23  
24  
25  
26  
27  
28  
29  
30  
31  
32  
33  
34  
35  
36  
37  
38  
39  
40  
41  
42  
43  
44  
45  
46  
47  
48  
49  
50  
51  
52  
53  
54  
55  
56  
57  
58  
59  
60
1. The study tested the association between implementation of five national CPR programs of ten UTIS programs proposed by the Global Resuscitation Alliance and better outcomes using nationwide OHCA data. All national OHCA who were transported by fire-based ambulance services were collected with very high representativeness.
  2. The degree of implementation or real change by implementation were not fully measured. This might be related with measurement bias. This study relates outcome to the implementation of some of the ten steps. Some of these steps can be fully or partially implemented and until now there are defined no common tool for assessing the individual steps.
  3. A natural change by years could not be completely adjusted for, even though we adjusted for individual risk factors when calculating the effect size. The before- and after-intervention study has those limitations.
  4. Emergency medical services with intermediate service level in Korea were different North America or European countries where advanced life support are given to OHCA at the field. Therefore the generalization should be cautious.

1  
2  
3  
4 Effect of National Implementation of Utstein Recommendation from the Global Resuscitation Alliance  
5 on Ten Steps to improve Outcomes from Out-of-Hospital Cardiac Arrest: A Ten-Year Observational  
6 Study in Korea  
7  
8  
9

## 10 11 BACKGROUND

12  
13  
14 Out-of-hospital cardiac arrest (OHCA) is a serious public health problem due to high incidence and  
15 low survival rates worldwide. (1-3) To improve the survival rates, community, emergency medical  
16 services (EMSs), and hospital efforts should be closely linked on the basis of evidence and scientific  
17 guidelines. (4-8) However, the implementation of evidence-based cardiopulmonary resuscitation  
18 (CPR) programs has been difficult due to socioeconomic, cultural, administrative, and behavioral  
19 barriers.  
20

21  
22 The Utstein Implementation Meeting was held in 2015 in Stavanger, Norway to discuss ways to  
23 implement scientific recommendations at the community level. From this meeting, the ten programs  
24 and ten actions for improving outcomes after OHCA were agreed as core public health CPR programs,  
25 The Utstein Ten-step Implementation Strategy (UTIS). The UTIS recommended the followings steps  
26 derived from expert consensus: 1) Cardiac arrest registry, 2) Telephone-assisted CPR, 3) High-  
27 performance CPR, 4) Rapid dispatch, 5) Measurement of professional resuscitation, 6) Automatic  
28 external defibrillator (AED) program for first responders, 7) Smart technologies for CPR and AED use,  
29 8) Mandatory training for CPR and AED, 9) Accountability, and 10) Culture of excellence. The UTIS  
30 was agreed and accepted by the Global Resuscitation Alliance, a new international collaborating  
31 organizations for facilitating and implementing the UTIS to the communities, in the following meeting  
32 during the EMS 2016 in Copenhagen.  
33  
34

35  
36 Although the UTIS was derived from scientific findings in many studies and experiences in different  
37 communities, the extent of the impact of implementing the UTIS CPR programs at the national level  
38 on outcomes is unclear. The goal of this study was to test the association between national  
39 implementation of the UTIS programs and outcomes of OHCA, as well as to test the interaction effect  
40 of the implementation of UTIS on outcomes across bystander CPR groups.  
41  
42  
43  
44  
45  
46  
47  
48  
49  
50  
51  
52  
53  
54



## METHODS

This is a before- and after-intervention study to test the association between the national implementation of novel CPR programs and outcomes after OHCA. The Korea Centers for Disease Control and Prevention (CDC) approved the use of all data, and the study was approved by the Institutional Review Board of the study site.

### Study setting

Approximately 50 million people live in a 99,000 km<sup>2</sup> area of land, where there were multiple regional and local government / hospital organizations: in 2015, there were 17 provinces and 253 local health departments (including 253 local health centers), 17 provincial fire departments, 200 local EMS agencies (966 ambulance stations and 1282 ambulances), and 546 emergency departments (EDs) (20 level 1 regional EDs, 2 specialty EDs, 124 level 2 local EDs, 274 level 3 emergency rooms, and 126 level 4 non-designated urgent facilities).

The Ministry of Health and Welfare EMS program is responsible for emergency care services, acts and regulations, budgeting and policy planning. The Korea Centers for Disease Control and Prevention (CDC) is responsible for the community CPR program by developing national standards and education programs. The National Medical Center is responsible for hospital-based emergency care through the ED evaluation program and reimbursement programs for hospital emergency care. The Central Fire Services (CFS) is responsible for pre-hospital ambulance services related to EMS (9, 10).

The 2005 and 2010 CPR guidelines recommended by the International Liaison Committee on Resuscitation (ILCOR) were accepted by the academic societies and implemented in the CPR training for lay persons, first responders, and EMS providers in 2006 and 2011, respectively.(11, 12) The EMS CPR protocol was developed by EMS medical directors in 2011 on the basis of 2010 guidelines. The protocol allowed the EMS providers to perform chest compression and automatic defibrillation, and endotracheal intubation or supraglottic airway under direct medical control during prehospital CPR. The epinephrine or other resuscitation drugs were not permitted to infuse. The termination of resuscitation declared by emergency medical technicians was not allowed and all OHCA should be transported to the emergency department with providing CPR on ambulance transport if the patients

1  
2  
3  
4 did not achieve the prehospital return of spontaneous circulation.  
5  
6

#### 7 8 Data sources

9  
10 The Korea OHCA Registry (KOHCAR) of cardiac arrest patients transported by ambulance services  
11 since 2006 has been constructed by the Korea CDC in collaboration with the central fire services  
12 (CFS). The EMS run sheet, EMS CPR registry, and dispatch CPR registry were merged into one EMS-  
13 assessed cardiac arrest database by the EMS quality committee of the CFS, which was sent to the  
14 Korea CDC. The Korea CDC cleaned the database of hospital information and reviewed the hospital  
15 records regarding inpatient care and outcomes. (9, 10, 13, 14) The KOHCAR was developed on the  
16 basis of recommendations from the international OHCA database and has been modified several  
17 times to fit the needs of health policy and planning, cost-effective data collection, and academic  
18 requirements.  
19

20  
21 Data quality management (DQM) was performed in two steps. First, the CFS educated and trained  
22 EMTs (mostly level 1) to record EMS data through the data dictionary of EMS record variables and  
23 education program. Medical oversight for each case was performed by EMS medical directors. Second,  
24 the Korea CDC educated and trained the hospital medical record reviewers (approximately 15  
25 persons), who were employed by the Korea CDC and worked only for the medical record review  
26 program. They were trained on data dictionary and case review protocols and dispatched to all  
27 hospitals to gather information on hospital care and outcomes. The first and second steps were  
28 supported by the same DQM committee members, consisting of EMS physicians, epidemiology and  
29 statistical experts, cardiologists, and medical record review experts. Every month, the DQM reviewed  
30 the collected data from the CFS and Korea CDC and sent feedback to both government partners.  
31  
32  
33  
34  
35  
36  
37  
38  
39  
40  
41  
42  
43  
44  
45

#### 46 Study population

47  
48 All adult patients (older than 15 years) with OHCA and with cardiac etiology transported by  
49 ambulance services between 2006 and 2015 were selected. We excluded patients who did not receive  
50 resuscitation in the field or during ambulance transport, patients who suffered an arrest at a hospital  
51 ED, arrests that were witnessed by EMS providers, and patients for whom outcome information was  
52 not available.  
53  
54  
55  
56

1  
2  
3  
4  
5  
6 National interventions and study groups

7  
8 To decide whether the UTIS program was or was not implemented in a community, each program was  
9 defined using a standard operational definition agreed to by the consensus of the study authors and  
10 the attendees of the GRA meeting at the EMS ASIA 2016 Congress (See Appendix 1 for the UTIS  
11 implementation status checklist that was discussed in the meeting).  
12

13  
14 The national intervention was defined as programs introduced under a new Act Article related to  
15 community, EMS, and hospital CPR programs among the UTIS programs. We finally selected and  
16 defined five of ten programs to make up a national intervention as follows: 1) Korea OHCA Registry  
17 (2008) 2) Telephone-assisted CPR (2011) 3) High performance CPR program (not implemented), 4)  
18 Rapid dispatch (2015), 5) Measurement of professional resuscitation (not implemented), 6) AED  
19 program for first responders (not implemented), 7) Smart technology for CPR and AED (not  
20 implemented), 8) Mandatory training program for CPR and AED (2008). 9) Accountability (2008),  
21 and 10) Cultural excellence (2011). We defined the intervention year as one year after the Act was  
22 enacted in the national assembly or the government regulation process began.  
23  
24

25  
26 The KOHCAR started the CAVAS project in 2008 and applied and was approved for status as national  
27 statistics in 2009. The telephone-assisted CPR program was implemented in Seoul in 2011 and  
28 implemented throughout the country in 2012, with mandatory inclusion in the dispatch CPR registry  
29 under the Rescue and EMS Act. Mandatory training programs for legally defined first responders,  
30 such as drivers, schoolteachers, police officers, rescuers and guards, were started by the EMS Act in  
31 2008. Another obligatory training program for students and teachers was implemented in 2012 by the  
32 School Health Act. All students in each primary, middle, and high school are required to attend at  
33 least one session of CPR training during each school year. Every schoolteacher is expected to learn  
34 CPR every three years, and health and sports teachers should retrain annually. Accountability for CPR  
35 was implemented in 2009. All statistics on CPR were reported to the public and the media via an  
36 annual symposium and press reports since 2009 and sent to all organizations. The cultural excellence  
37 in CPR program was selected because under the Rescue and EMS Act, EMS medical directors have  
38 been working at local fire departments as employed medical directors since 2012. Every individual  
39 OHCA case was reviewed by the directors and scored for feedback to EMS providers.  
40  
41  
42  
43  
44  
45  
46  
47  
48  
49  
50  
51  
52  
53  
54  
55  
56

1  
2  
3  
4 We defined the five interventions and control according to the year of implementation as follows: 1)  
5 KOHCAR (2009), 2) Telephone-assisted CPR (2012), 3) Mandatory CPR program (2009), 4)  
6 Accountability (2009), and 5) Cultural excellence (2012). From those set time points, we defined the  
7 three phases of the observational period: 1) Control phase (2006-2008), 2) Primary intervention  
8 (phase 1) (2009-2011) after implementing KOHCAR, Mandatory CPR training, and Accountability,  
9 and 3) Secondary intervention (phase 2) (2012-2015) after implementing the T-CPR program and  
10 Cultural excellence, including EMS quality assurance programs (Figure 1).  
11  
12  
13  
14  
15  
16  
17  
18

#### 19 Data variables

20 We selected several potential confounders for outcomes. These confounders included age, gender,  
21 urbanization level (metropolitan city>1 million population, urban/suburban city>50000 population,  
22 and rural< 50000 per county), place of the event (public, private, unknown), event witness (witnessed,  
23 unwitnessed), bystander CPR (yes or no), bystander defibrillation (yes or no), dispatch assistance (yes  
24 or no), cause (cardiac, trauma, poisoning, drowning, asphyxia/hanging, and other), primary ECG  
25 rhythm (VF/ pulseless VT, PEA, asystole), date and time of onset (season, weekday, and day/ night),  
26 number of members of ambulance crew, top level of EMS providers (level 1, level 2, lower), airway  
27 management (endotracheal intubation, supraglottic airway, bag-valve mask ventilation, passive  
28 oxygen ventilation), EMS defibrillation (yes or no), elapsed time intervals (response time interval  
29 (RTI), scene time interval (STI), transport time interval (TTI), trauma level of ED (level 1 to 4),  
30 achievement of pre-hospital ROSC, survival to discharge, and a measure of neurological recovery,  
31 such as cerebral performance category 1 or 2.  
32  
33  
34  
35  
36  
37  
38  
39  
40  
41  
42  
43

#### 44 Outcome measure

45 The primary outcome was survival with good neurological recovery (CPC 1 or 2) at discharge. The  
46 secondary outcome was survival to discharge. The tertiary outcome was pre-hospital ROSC. All  
47 outcomes were measured by the Korea CDC medical record reviewers, who had visited the hospital to  
48 evaluate the medical records. They extracted information from the hospital discharge summaries,  
49 which are usually used for the national health insurance reimbursement program.  
50  
51  
52  
53  
54  
55  
56  
57  
58  
59  
60

## Statistical analysis

Demographic findings were described as percentages (%) for categorical variables or medians (q1 and q3) and were compared using the Chi-square test or Wilcoxon rank sum test with the significance level ( $p$  value $<0.05$ ). We estimated the crude incidence rates (IRs) for 100,000 population of each year. The IRs were calculated from the total number of OHCA with all causes in all gender/ age group divided by the total number of population multiplying 100,000. Potential risk factors were tested for trends by year. We tested the trend for age- and gender-standardized outcomes using the whole study population as a standard population. All trends were tested by the Cochran-Armitage test.

Each UTIS intervention was tested for the association with outcome variables, and then we tested the UTIS intervention phases 1 and 2 (phase 1 in 2009-2011 and phase 2 in 2012-2015) compared with the control phase group (2006-2008), adjusting for the potential confounders identified above. Potential confounders were selected to avoid the mediator effect. We performed a multivariate logistic regression analysis for the UTIS on the outcomes, adjusted for potential confounders such as age, gender, urbanization level of the event location, place (private, public, unknown), event witness (witnessed, unwitnessed, unknown), primary ECG rhythm (VF/pulseless VT, PEA, and asystole), response time intervals from call to ED arrival, scene time interval (STI) from arrival to the scene and departure to ED, advanced airway management (ETI, SGA, BVM, PV), level of ED (level 1 to 4), and implemented international CPR guidelines (2005 vs. 2010) for all patients. The 2005 and 2010 guideline were implemented during 2006-2010 and 2011-2015, respectively.

Additionally, interaction analysis was performed using an interaction model with the interaction term (study phase\*bystander CPR), which was added to the final multivariate logistic regression model.

We performed the sensitivity analysis for appropriate comparison on the Utstein OHCA population who had cardiac etiology, witnessed status, and initial shockable rhythm using the same multivariable logistic regression according to study period on outcomes.

All statistical analyses were performed using SAS software, version 9.4 (SAS institute Inc., Cary, NC, USA).

## RESULTS

## Demographics

Of 229,361 OHCA during the study period, a total of 128,888 eligible patients were analyzed, excluding patients who were less than age 15 (n=4,478), had non-cardiac etiologies for arrest (n=68,152), for whom resuscitation was not attempted (n=23,807), whose arrest was witnessed in an ambulance (n=39,090), or who did not have available hospital outcome information (n=127). (Fig. 2)

The demographics among study groups are compared in Table 1. Compared with the control group, the phase 1 and 2 groups had the following characteristics: older, predominantly female, occurred more often in private places, more shockable rhythms, less witnessed, more bystander CPR, staffing with more level 1 EMTs, more members in the ambulance crew, longer response times, increased scene time intervals, more advanced airway management, and higher trauma levels of ED (all p values <.001). Patients included in Phases 1 and 2 had much better outcomes than those in the control phase (all p values <.001).

## Trend analysis

Fig. 3 shows trends in crude incidence rate, bystander CPR, pre-hospital ROSC, survival to discharge, and good neurological recovery by year. There were significant changes from 2006 to 2015 in bystander CPR (1.2% in 2006 versus 16.4% in 2016), pre-hospital ROSC (0.8% in 2006 versus 7.1% in 2015), survival to discharge (3.0% in 2006 versus 6.1% in 2015), and good neurological recovery (1.2% in 2006 versus 4.1% in 2015). (p for trend <.001) The prehospital ROSC was higher than survival to discharge rate in 2015.

The age-and gender-standardized survival rates (SSRs) were calculated using a direct standardization that used the whole OHCA population during study period as a reference population (Table 2). SSRs were 2.6 in 2006 versus 6.9 in 2015 per 100 OHCA person-years. SSRs with good neurological recovery were 0.8 in 2006 versus 4.7 in 2015 per 100 OHCA person-years.

Table 3 shows the trend of crude incidence rates and risk factors stratified by year. The crude incidence rates per 100,000 were 18.2 in 2006 and 41.1 in 2015, respectively. Metropolitan locations, season and weekend were not significantly changed by year (p for trend<0.001). The proportions of women and elderly patients older than 80 years, private places, and unwitnessed OHCA, as well as

shorter response time intervals (<4 min.), were increased (p for trend <.001) and were correlated with poor outcomes. By contrast, proportions of bystander CPR and shockable rhythm, longer scene time intervals (>8 min.), increase in the number and level of EMT crew members, advanced airway management, and higher trauma level of ED of the destination hospital were increased (p for trend <.001).

#### Multivariate logistic analysis

Table 4 shows the association between implementation phase and outcome from multivariate logistic regression analysis. AORs (95% CIs) on good neurological recovery in model 2 were 1.82 (1.53-2.15) for phase 1 and 2.21 (1.78-2.75) for phase 2. AORs (95% CI) in model 2 were 1.79 (1.62-1.98) (phase 1) and 1.78 (1.56-2.04) (phase 2) on survival to discharge and 2.20 (1.86-2.59) (phase 1) and 3.47 (2.84-4.24) (phase 2) on pre-hospital ROSC, respectively.

#### Interaction analysis

Interaction analysis for comparison of the effect size by study phase according to bystander cardiopulmonary resuscitation was performed (Table 5). The implementation of phases 1 and 2 had different magnitudes of effects on good neurological recovery based on patient groups that received or did not receive bystander CPR. In terms of good neurological recovery, there was a significant interaction between phases 1 and 2 and bystander CPR (both p values <.05). There was no significant interaction between pre-hospital ROSC in phases 1 or 2 with bystander CPR (both p values >0.05).

#### Sensitivity Analysis

Sensitivity analysis was performed for the Utstein OHCA population. The AORs (95% CIs) on good neurological recovery in the model with adjusted for the full confounders (Model 2) were 1.32 (1.00-1.75) for phase 1 and 5.76 (4.56-7.28) for phase 2. AORs (95% CI) in model 2 were 1.22 (0.98-1.51) (phase 1) and 3.79 (3.14-4.58) (phase 2) on survival to discharge and 1.09 (0.74-1.60) (phase 1) and 14.36 (10.66-19.36) (phase 2) on pre-hospital ROSC, respectively (Table 6).

#### DISCUSSION

1  
2  
3  
4  
5  
6 The implementation of the Utstein ten-steps programs was associated with increase in prehospital  
7 ROSC, survival to discharge and good neurological recovery during 10-years observational period in  
8 Korea. During the study period, five programs were implemented, including CPR registry, obligatory  
9 CPR training, and public reports in 2008 and telephone-assisted CPR, and in-depth medical oversight  
10 for EMS CPR in 2011. The interventions were found to have significant effects on outcomes in both  
11 phases. The AORs for good CPC were 2.22 in phase 2 and 3.22 in phase 3.

12  
13  
14  
15  
16  
17  
18  
19  
20  
21  
22  
23  
24  
25  
26  
27  
28  
29  
30  
31  
32  
33  
34  
35  
36  
37  
38  
39  
40  
41  
42  
43  
44  
45  
46  
47  
48  
49  
50  
51  
52  
53  
54  
55  
56  
57  
58  
59  
60  
There were several reports on the association between community implementation of CPR programs  
and improved outcomes. One report from Denmark showed the significant improvement in outcomes  
by implementation of community programs (15). Analysis using resuscitation attempted OHCA  
between 2001 and 2010 in the nationwide Danish Cardiac Arrest Registry (n=19468 showed the  
significant increase in bystander CPR rate (21.1% in 2001 to 44.9% 2010) and increase in survival on  
hospital arrival (7.9% in 2001 to 21.8% in 2010), and finally improvement in 30-days survival (3.5% in  
2001 to 10.8% in 2010) and 1-year survival (2.9% in 2001 to 10.2% in 2010) (All p-values < .001).  
Although the study did not analyze the association between the phase of the national initiatives or  
implementation of CPR programs and outcome, the findings were very similar to those of our study.

During the ten-year study period, the risk factors were influenced by natural changes in characteristics  
or by the interventions. To compare the risk factors and outcomes among countries, regions, and local  
communities and to monitor the trends by year, we need a novel OHCA registry based on a standard  
report form that includes demographic, system-related, EMS-related, and hospital-related  
information. (16, 17) There may be huge variations in outcomes in different communities due to  
resources, policies, and system efforts during a long study period. (18-20). One of the issues related to  
variations in outcomes is the selection bias of denominators and numerators, which can be calculated  
with different study population criteria. (21) To select a study population as a denominator, an EMS-  
assessed or EMS-treated population would be standardized to determine incidence and trends in  
general outcomes. To measure the effect size of the intervention, the Utstein criteria, including  
witnessed events and shockable rhythm, are recommended. (16, 22) Risk factors would be different in  
different populations, such as in older patients. (23) To compare the outcomes among communities in  
the observed time intervals, we used age- and gender-adjusted survival rates as well as Utstein



1  
2  
3  
4 survival rates instead of crude survival rates. (9, 18, 19)

5  
6 Korea has collected OHCA data for the last ten years and reported the risk factors and outcomes to the  
7  
8 public (9, 10). There were multiple national-level interventions derived and implemented by the  
9  
10 national government and individual-level interventions accepted and practiced by academic societies  
11  
12 and hospitals according to international guidelines (8, 17). The country experienced a rapid increase  
13  
14 in population age and change in EMS protocols for selecting patients or time intervals for providing  
15  
16 CPR in the field, which may influence the calculated outcome rates. (3, 9, 24) For the study period, we  
17  
18 observed changes in both favorable and unfavorable risk factors. Characteristics of the natural  
19  
20 population of OHCA patients that were associated with poor outcomes included increases in the  
21  
22 elderly and in female patients (25-27), increase in response time (3, 28), private location of OHCA (3,  
23  
24 10), and unwitnessed OHCA (9, 10). These risks are related to aging of the population. However,  
25  
26 several favorable factors also increased, such as bystander CPR (3, 19, 29), shockable rhythm (3, 10,  
27  
28 19), scene time interval (24), number of EMTs in the ambulance and level of the top EMT. Advanced  
29  
30 life support techniques, such as advanced airway management, increased, though the effect of  
31  
32 advanced life support techniques on outcomes is controversial (30, 31).

33  
34 Primary intervention programs, such as system monitoring using a nationwide OHCA registry,  
35  
36 followed by EMS CPR registry and dispatch registry, might encourage health policy makers to develop  
37  
38 programs to improve outcomes after OHCA. The media reported the nationwide outcomes in 2009  
39  
40 and deeply analyzed the causes of poor outcomes and regional variation and provided solutions to  
41  
42 improve outcomes. Due to active media coverage, the budget was increased to fund CPR training for  
43  
44 lay persons. The OHCA registry enabled monitoring of the various components and revealed  
45  
46 weaknesses that led to poorer outcomes (3, 18, 19, 28, 32).

47  
48 The one of the secondary interventions was the telephone-assisted CPR program, and it was reported  
49  
50 to have strong effects (10). This program involved strong education and quality assurance programs.  
51  
52 Dispatch-assisted CPR rates quickly increased in up to 50% of all detected OHCA. The  
53  
54 comprehensive medical oversight program was implemented by the Rescue and EMS Act. In this  
55  
56 program, every EMS agency under a fire department was directed to employ a medical director at  
57  
58 least part-time and to provide a full range of information on CPR performance of the EMS crew,  
59  
60 including an EMS CPR registry and ECG rhythm analysis.

1  
2  
3  
4 The prehospital ROSC was higher than survival to discharge rate in 2015. The survival to discharge  
5 rate was not increased than 2014, while the good neurological recovery rates and prehospital ROSC  
6 rates continuously increased. Increase in bystander CPR might contribute the continuous  
7 improvement in prehospital ROSC and good brain recovery. Bystander CPR had interaction with  
8 study phases for the outcomes. During the study period, the percentage of patients who received  
9 bystander CPR increased continuously. Thus, study phases were interactively related with bystander  
10 CPR. In terms of good CPC, the sizes of the effects of phases 1 and 2 were significantly greater in  
11 patients who received bystander CPR.  
12

13  
14  
15 From the sensitivity analysis on Utstein OHCA population whose proportion was 4.6% of original  
16 study population, we found the similar effect of Utstein ten-steps CPR programs on outcomes  
17 according to phases. The good neurological recovery was significantly improved in both phase 1 and  
18 phase 2, and survival to discharge and prehospital ROSC was significantly improved in phase 2. The  
19 results were similar to those of original OHCA population.  
20  
21  
22  
23  
24  
25  
26  
27  
28

### 29 Limitations

30  
31 The first limitation is the definition of intervention used in this study. The study intervention was  
32 operationally defined based on expert consensus. This method could cause measurement bias,  
33 resulting in differences when the program is fully implemented on a larger scale. Potential  
34 interventions were selected from the Utstein Ten-step Implementation Strategy program, and final  
35 interventions were enforced by government acts.  
36  
37  
38  
39

40 The second limitation is the exclusion criteria, including unknown outcomes, pediatric patients and  
41 non-cardiac etiology. Therefore, the results of this study should only be interpreted in the context of  
42 the groups of patients enrolled.  
43  
44

45  
46 The third limitation is related to the study setting. In Korea, the emergency services are intermediate,  
47 which is very different from the advanced services provided in some communities in North America or  
48 Europe. Thus, one should be cautious with respect to generalizability.  
49  
50

### 51 CONCLUSION

1  
2  
3  
4 Implementation of national OHCA registry, regular public reports, mandatory CPR training program,  
5 telephone-assisted CPR program, and medical oversight for EMS CPR performance, which are  
6 recommended by the Global Resuscitation Alliance, were significantly associated with better outcomes  
7  
8 in the 10-years of before-and after-study in Korea.  
9  
10  
11  
12  
13  
14  
15  
16  
17  
18  
19  
20  
21  
22  
23  
24  
25  
26  
27  
28  
29  
30  
31  
32  
33  
34  
35  
36  
37  
38  
39  
40  
41  
42  
43  
44  
45  
46  
47  
48  
49  
50  
51  
52  
53  
54  
55  
56  
57  
58  
59  
60

For peer review only

#### Contributorship statement

Kim YT has developed the data collection system and led the public health program. Dr. Kim developed the idea of this paper and wrote the draft. Drs. Song KJ, Ro YS, Ahn KO, and Hong KJ collected the data and contributed the quality management. Dr. Hong SO collected raw data and maintain the quality via education and training the study coordinators. Dr. Shin SD has the full responsibility of the paper. All authors are accessible to the data and agreed with submission of this manuscript to the journal.

#### Competing interests

No conflicts of interest are associated with this study.

#### Funding

This study was supported by the National Emergency Management Agency of Korea and the Korea Centers for Disease Control and Prevention (CDC). The study was funded by the Korea CDC (2011-2015) (Grant No.: 2011- Grant for Private Support Program; 2012-E33010-00; 2013-E33015-00; 2014-E33011-00; 2015-Grant for Private Support Program). And the Central Fire Services provided support for data collection.

#### Data sharing statement

The Korea Centers for Disease Control and Prevention owns the whole data which are accessible to. If a researcher wants to use the data, the researcher should get a permission for the use of the data.

## REFERENCES

1. Berdowski J, Berg RA, Tijssen JG, Koster RW. Global incidences of out-of-hospital cardiac arrest and survival rates: Systematic review of 67 prospective studies. *Resuscitation*. 2010;81(11):1479-87.
2. Grasner JT, Lefering R, Koster RW, Masterson S, Bottiger BW, Herlitz J, et al. EuReCa ONE-27 Nations, ONE Europe, ONE Registry: A prospective one month analysis of out-of-hospital cardiac arrest outcomes in 27 countries in Europe. *Resuscitation*. 2016;105:188-95.
3. Ong ME, Shin SD, De Souza NN, Tanaka H, Nishiuchi T, Song KJ, et al. Outcomes for out-of-hospital cardiac arrests across 7 countries in Asia: The Pan Asian Resuscitation Outcomes Study (PAROS). *Resuscitation*. 2015;96:100-8.
4. Hazinski MF, Nolan JP, Aickin R, Bhanji F, Billi JE, Callaway CW, et al. Part 1: Executive Summary: 2015 International Consensus on Cardiopulmonary Resuscitation and Emergency Cardiovascular Care Science With Treatment Recommendations. *Circulation*. 2015;132(16 Suppl 1):S2-39.
5. Travers AH, Perkins GD, Berg RA, Castren M, Considine J, Escalante R, et al. Part 3: Adult Basic Life Support and Automated External Defibrillation: 2015 International Consensus on Cardiopulmonary Resuscitation and Emergency Cardiovascular Care Science With Treatment Recommendations. *Circulation*. 2015;132(16 Suppl 1):S51-83.
6. Singletary EM, Charlton NP, Epstein JL, Ferguson JD, Jensen JL, MacPherson AI, et al. Part 15: First Aid: 2015 American Heart Association and American Red Cross Guidelines Update for First Aid. *Circulation*. 2015;132(18 Suppl 2):S574-89.
7. Kronick SL, Kurz MC, Lin S, Edelson DP, Berg RA, Billi JE, et al. Part 4: Systems of Care and Continuous Quality Improvement: 2015 American Heart Association Guidelines Update for Cardiopulmonary Resuscitation and Emergency Cardiovascular Care. *Circulation*. 2015;132(18 Suppl 2):S397-413.
8. Callaway CW, Donnino MW, Fink EL, Geocadin RG, Golan E, Kern KB, et al. Part 8: Post-Cardiac Arrest Care: 2015 American Heart Association Guidelines Update for Cardiopulmonary Resuscitation and Emergency Cardiovascular Care. *Circulation*. 2015;132(18 Suppl 2):S465-82.

- 1  
2  
3  
4 9. Ro YS, Shin SD, Song KJ, Lee EJ, Kim JY, Ahn KO, et al. A trend in epidemiology and  
5 outcomes of out-of-hospital cardiac arrest by urbanization level: a nationwide observational study  
6 from 2006 to 2010 in South Korea. *Resuscitation*. 2013;84(5):547-57.
- 7  
8  
9 10. Ro YS, Shin SD, Lee YJ, Lee SC, Song KJ, Ryoo HW, et al. Effect of Dispatcher-Assisted  
10 Cardiopulmonary Resuscitation Program and Location of Out-of-Hospital Cardiac Arrest on Survival  
11 and Neurologic Outcome. *Ann Emerg Med*. 2016.
- 12  
13 11. International Liaison Committee on R. 2005 International Consensus on Cardiopulmonary  
14 Resuscitation and Emergency Cardiovascular Care Science with Treatment Recommendations. Part 2:  
15 Adult basic life support. *Resuscitation*. 2005;67(2-3):187-201.
- 16  
17 12. Berg RA, Hemphill R, Abella BS, Aufderheide TP, Cave DM, Hazinski MF, et al. Part 5: adult  
18 basic life support: 2010 American Heart Association Guidelines for Cardiopulmonary Resuscitation  
19 and Emergency Cardiovascular Care. *Circulation*. 2010;122(18 Suppl 3):S685-705.
- 20  
21 13. Ahn KO, Shin SD, Suh GJ, Cha WC, Song KJ, Kim SJ, et al. Epidemiology and outcomes from  
22 non-traumatic out-of-hospital cardiac arrest in Korea: A nationwide observational study.  
23 *Resuscitation*. 2010;81(8):974-81.
- 24  
25 14. Kim JY, Shin SD, Ro YS, Song KJ, Lee EJ, Park CB, et al. Post-resuscitation care and  
26 outcomes of out-of-hospital cardiac arrest: a nationwide propensity score-matching analysis.  
27 *Resuscitation*. 2013;84(8):1068-77.
- 28  
29 15. Wissenberg M, Lippert FK, Folke F, Weeke P, Hansen CM, Christensen EF, et al. Association  
30 of national initiatives to improve cardiac arrest management with rates of bystander intervention and  
31 patient survival after out-of-hospital cardiac arrest. *JAMA*. 2013;310(13):1377-84.
- 32  
33 16. Jacobs I, Nadkarni V, Bahr J, Berg RA, Billi JE, Bossaert L, et al. Cardiac arrest and  
34 cardiopulmonary resuscitation outcome reports: update and simplification of the Utstein templates  
35 for resuscitation registries: a statement for healthcare professionals from a task force of the  
36 International Liaison Committee on Resuscitation (American Heart Association, European  
37 Resuscitation Council, Australian Resuscitation Council, New Zealand Resuscitation Council, Heart  
38 and Stroke Foundation of Canada, InterAmerican Heart Foundation, Resuscitation Councils of  
39 Southern Africa). *Circulation*. 2004;110(21):3385-97.
- 40  
41 17. Perkins GD, Jacobs IG, Nadkarni VM, Berg RA, Bhanji F, Biarent D, et al. Cardiac Arrest and  
42  
43  
44  
45  
46  
47  
48  
49  
50  
51  
52  
53  
54  
55  
56  
57  
58  
59  
60

1  
2  
3  
4 Cardiopulmonary Resuscitation Outcome Reports: Update of the Utstein Resuscitation Registry  
5  
6 Templates for Out-of-Hospital Cardiac Arrest: A Statement for Healthcare Professionals From a Task  
7  
8 Force of the International Liaison Committee on Resuscitation (American Heart Association,  
9  
10 European Resuscitation Council, Australian and New Zealand Council on Resuscitation, Heart and  
11  
12 Stroke Foundation of Canada, InterAmerican Heart Foundation, Resuscitation Council of Southern  
13  
14 Africa, Resuscitation Council of Asia); and the American Heart Association Emergency Cardiovascular  
15  
16 Care Committee and the Council on Cardiopulmonary, Critical Care, Perioperative and Resuscitation.  
17  
18 Resuscitation. 2015;96:328-40.

19  
20 18. Chan PS, McNally B, Tang F, Kellermann A, Group CS. Recent trends in survival from out-of-  
21  
22 hospital cardiac arrest in the United States. *Circulation*. 2014;130(21):1876-82.

23  
24 19. McNally B, Robb R, Mehta M, Vellano K, Valderrama AL, Yoon PW, et al. Out-of-hospital  
25  
26 cardiac arrest surveillance --- Cardiac Arrest Registry to Enhance Survival (CARES), United States,  
27  
28 October 1, 2005--December 31, 2010. *MMWR Surveill Summ*. 2011;60(8):1-19.

29  
30 20. Nichol G, Thomas E, Callaway CW, Hedges J, Powell JL, Aufderheide TP, et al. Regional  
31  
32 variation in out-of-hospital cardiac arrest incidence and outcome. *JAMA*. 2008;300(12):1423-31.

33  
34 21. Nishiyama C, Brown SP, May S, Iwami T, Koster RW, Beesems SG, et al. Apples to apples or  
35  
36 apples to oranges? International variation in reporting of process and outcome of care for out-of-  
37  
38 hospital cardiac arrest. *Resuscitation*. 2014;85(11):1599-609.

39  
40 22. McNally B, Stokes A, Crouch A, Kellermann AL, Group CS. CARES: Cardiac Arrest Registry  
41  
42 to Enhance Survival. *Ann Emerg Med*. 2009;54(5):674-83 e2.

43  
44 23. Andersen LW, Bivens MJ, Giberson T, Giberson B, Mottley JL, Gautam S, et al. The  
45  
46 relationship between age and outcome in out-of-hospital cardiac arrest patients. *Resuscitation*.  
47  
48 2015;94:49-54.

49  
50 24. Shin SD, Kitamura T, Hwang SS, Kajino K, Song KJ, Ro YS, et al. Association between  
51  
52 resuscitation time interval at the scene and neurological outcome after out-of-hospital cardiac arrest  
53  
54 in two Asian cities. *Resuscitation*. 2014;85(2):203-10.

55  
56 25. Libungan B, Lindqvist J, Stromsoe A, Nordberg P, Hollenberg J, Albertsson P, et al. Out-of-  
57  
58 hospital cardiac arrest in the elderly: A large-scale population-based study. *Resuscitation*. 2015;94:28-  
59  
60 32.

- 1  
2  
3  
4 26. Kim LK, Looser P, Swaminathan RV, Horowitz J, Friedman O, Shin JH, et al. Sex-Based  
5 Disparities in Incidence, Treatment, and Outcomes of Cardiac Arrest in the United States, 2003-2012.  
6 J Am Heart Assoc. 2016;5(6).  
7  
8  
9 27. Ng YY, Wah W, Liu N, Zhou SA, Ho AF, Pek PP, et al. Associations between gender and  
10 cardiac arrest outcomes in Pan-Asian out-of-hospital cardiac arrest patients. Resuscitation.  
11 2016;102:116-21.  
12  
13 28. Ono Y, Hayakawa M, Iijima H, Maekawa K, Kodate A, Sadamoto Y, et al. The response time  
14 threshold for predicting favourable neurological outcomes in patients with bystander-witnessed out-  
15 of-hospital cardiac arrest. Resuscitation. 2016;107:65-70.  
16  
17 29. Fosbol EL, Dupre ME, Strauss B, Swanson DR, Myers B, McNally BF, et al. Association of  
18 neighborhood characteristics with incidence of out-of-hospital cardiac arrest and rates of bystander-  
19 initiated CPR: implications for community-based education intervention. Resuscitation.  
20 2014;85(11):1512-7.  
21  
22 30. McMullan J, Gerecht R, Bonomo J, Robb R, McNally B, Donnelly J, et al. Airway  
23 management and out-of-hospital cardiac arrest outcome in the CARES registry. Resuscitation.  
24 2014;85(5):617-22.  
25  
26 31. Jeong S, Ahn KO, Shin SD. The role of prehospital advanced airway management on  
27 outcomes for out-of-hospital cardiac arrest patients: a meta-analysis. Am J Emerg Med. 2016.  
28  
29 32. Soholm H, Hassager C, Lippert F, Winther-Jensen M, Thomsen JH, Friberg H, et al. Factors  
30 Associated With Successful Resuscitation After Out-of-Hospital Cardiac Arrest and Temporal Trends  
31 in Survival and Comorbidity. Ann Emerg Med. 2015;65(5):523-31 e2.  
32  
33  
34  
35  
36  
37  
38  
39  
40  
41  
42  
43  
44  
45  
46  
47  
48  
49  
50  
51  
52  
53  
54  
55  
56  
57  
58  
59  
60



## FIGURE LEGENDS

Figure 1 National Implementation of Utstein Ten-step Implementation Strategy by study period

CPR: cardiopulmonary resuscitation

AED: automatic external defibrillation

KOHCAR: Korea out-of-hospital cardiac arrest registry

EMS: emergency medical services

T-CPR: telephone-assisted CPR

OA: quality assurance

OHCA: out-of-hospital cardiac arrest

Figure 2 Study subjects

EMS: emergency medical service

OHCA: out-of-hospital cardiac arrest

CPR: cardiopulmonary resuscitation

Figure 3 Longitudinal trend of outcomes in out-of-hospital cardiac arrest in Korea

ROSC: return of spontaneous circulation

CPC: cerebral performance scale

Table 1. Demographic findings of study population among intervention phase groups and control

| Variables       | All        |       | Control    |       | Phase 1    |       | Phase 2    |       | P-value |
|-----------------|------------|-------|------------|-------|------------|-------|------------|-------|---------|
|                 | N          | %     | N          | %     | N          | %     | N          | %     |         |
| Total           | 128888     | 100.0 | 25045      | 100.0 | 39366      | 100.0 | 64477      | 100.0 |         |
| Age             |            |       |            |       |            |       |            |       | <.001   |
| 15-39, years    | 7004       | 5.4   | 1835       | 7.3   | 2262       | 5.7   | 2907       | 4.5   |         |
| 40-59, years    | 33451      | 26.0  | 7431       | 29.7  | 10590      | 26.9  | 15430      | 23.9  |         |
| 60-79, years    | 59360      | 46.1  | 11661      | 46.6  | 18389      | 46.7  | 29310      | 45.5  |         |
| 80+, years      | 29073      | 22.6  | 4118       | 16.4  | 8125       | 20.6  | 16830      | 26.1  |         |
| Median (q1-q3)  | 56 (70-79) |       | 53 (66-76) |       | 55 (69-78) |       | 58 (72-80) |       |         |
| Gender          |            |       |            |       |            |       |            |       | <.001   |
| Female          | 45913      | 35.6  | 8637       | 34.5  | 13789      | 35.0  | 23487      | 36.4  |         |
| Male            | 82975      | 64.4  | 16408      | 65.5  | 25577      | 65.0  | 40990      | 63.6  |         |
| Metropolis      |            |       |            |       |            |       |            |       | 0.486   |
| Non-metropolis  | 74188      | 57.6  | 14444      | 57.7  | 22736      | 57.8  | 37008      | 57.4  |         |
| Metropolis      | 54700      | 42.4  | 10601      | 42.3  | 16630      | 42.2  | 27469      | 42.6  |         |
| Place           |            |       |            |       |            |       |            |       | <.001   |
| Public          | 26282      | 20.4  | 7421       | 29.6  | 7412       | 18.8  | 11449      | 17.8  |         |
| Private         | 101191     | 78.5  | 17265      | 68.9  | 31622      | 80.3  | 52304      | 81.1  |         |
| Unknown         | 1415       | 1.1   | 359        | 1.4   | 332        | 0.8   | 724        | 1.1   |         |
| Primary ECG     |            |       |            |       |            |       |            |       | <.001   |
| VF/pulseless VT | 8584       | 6.7   | 1327       | 5.3   | 1624       | 4.1   | 5633       | 8.7   |         |
| PEA             | 7241       | 5.6   | 907        | 3.6   | 1844       | 4.7   | 4490       | 7.0   |         |
| Asystole        | 113063     | 87.7  | 22811      | 91.1  | 35898      | 91.2  | 54354      | 84.3  |         |
| Witnessed       |            |       |            |       |            |       |            |       | <.001   |
| No              | 71269      | 55.3  | 13190      | 52.7  | 21266      | 54.0  | 36813      | 57.1  |         |
| Yes             | 57619      | 44.7  | 11855      | 47.3  | 18100      | 46.0  | 27664      | 42.9  |         |
| Bystander CPR   |            |       |            |       |            |       |            |       | <.001   |
| No              | 118110     | 91.6  | 24553      | 98.0  | 37499      | 95.3  | 56058      | 86.9  |         |
| Yes             | 10778      | 8.4   | 492        | 2.0   | 1867       | 4.7   | 8419       | 13.1  |         |
| Season          |            |       |            |       |            |       |            |       | <.001   |
| MAR.-MAY        | 32731      | 25.4  | 6173       | 24.6  | 10152      | 25.8  | 16406      | 25.4  |         |
| JUN-AUG         | 28166      | 21.9  | 5692       | 22.7  | 8703       | 22.1  | 13771      | 21.4  |         |
| SEP-NOV         | 21998      | 17.1  | 4329       | 17.3  | 6664       | 16.9  | 11005      | 17.1  |         |
| DEC-FEB         | 45993      | 35.7  | 8851       | 35.3  | 13847      | 35.2  | 23295      | 36.1  |         |
| Weekend         |            |       |            |       |            |       |            |       | <.001   |
| Weekday         | 90739      | 70.4  | 17519      | 70.0  | 27696      | 70.4  | 45524      | 70.6  |         |
| Weekend         | 38149      | 29.6  | 7526       | 30.0  | 11670      | 29.6  | 18953      | 29.4  |         |

|                         |          |      |          |      |          |      |          |      |  |       |
|-------------------------|----------|------|----------|------|----------|------|----------|------|--|-------|
| Hour of the event       |          |      |          |      |          |      |          |      |  | 0.152 |
| 0-5 hour                | 19123    | 14.8 | 3743     | 14.9 | 5949     | 15.1 | 9431     | 14.6 |  |       |
| 6-11 hour               | 41729    | 32.4 | 7779     | 31.1 | 12641    | 32.1 | 21309    | 33.0 |  |       |
| 12-17 hour              | 36745    | 28.5 | 7088     | 28.3 | 11199    | 28.4 | 18458    | 28.6 |  |       |
| 18-23 hour              | 31291    | 24.3 | 6435     | 25.7 | 9577     | 24.3 | 15279    | 23.7 |  |       |
| Level of EMT            |          |      |          |      |          |      |          |      |  | <.001 |
| Level 1                 | 89908    | 69.8 | 12888    | 51.5 | 24088    | 61.2 | 52932    | 82.1 |  |       |
| Level 2                 | 32502    | 25.2 | 9336     | 37.3 | 13248    | 33.7 | 9918     | 15.4 |  |       |
| Level 3                 | 6478     | 5.0  | 2821     | 11.3 | 2030     | 5.2  | 1627     | 2.5  |  |       |
| No of ambulance crew    |          |      |          |      |          |      |          |      |  |       |
| 1                       | 16187    | 12.6 | 6504     | 26.0 | 4418     | 11.2 | 5265     | 8.2  |  |       |
| 2                       | 88251    | 68.5 | 15403    | 61.5 | 28745    | 73.0 | 44103    | 68.4 |  |       |
| 3                       | 24450    | 19.0 | 3138     | 12.5 | 6203     | 15.8 | 15109    | 23.4 |  |       |
| Response time interval  |          |      |          |      |          |      |          |      |  | <.001 |
| 0-3 min.                | 10289    | 8.0  | 2806     | 11.2 | 3491     | 8.9  | 3992     | 6.2  |  |       |
| 4-7 min.                | 66753    | 51.8 | 13845    | 55.3 | 21205    | 53.9 | 31703    | 49.2 |  |       |
| 8-11 min.               | 31796    | 24.7 | 5265     | 21.0 | 8992     | 22.8 | 17539    | 27.2 |  |       |
| 12-15 min.              | 11349    | 8.8  | 1696     | 6.8  | 3141     | 8.0  | 6512     | 10.1 |  |       |
| 15- min.                | 8701     | 6.8  | 1433     | 5.7  | 2537     | 6.4  | 4731     | 7.3  |  |       |
| Median (q1-q3)          | 7 (5-9)  |      | 6 (5-9)  |      | 6 (5-9)  |      | 7 (5-10) |      |  |       |
| Scene time interval     |          |      |          |      |          |      |          |      |  | <.001 |
| 0-3 min.                | 21491    | 16.7 | 7590     | 30.3 | 8490     | 21.6 | 5411     | 8.4  |  |       |
| 4-7 min.                | 47572    | 36.9 | 10195    | 40.7 | 16479    | 41.9 | 20898    | 32.4 |  |       |
| 8-11 min.               | 34675    | 26.9 | 4490     | 17.9 | 8935     | 22.7 | 21250    | 33.0 |  |       |
| 12-15 min.              | 15072    | 11.7 | 1663     | 6.6  | 3379     | 8.6  | 10030    | 15.6 |  |       |
| 15- min.                | 10078    | 7.8  | 1107     | 4.4  | 2083     | 5.3  | 6888     | 10.7 |  |       |
| Median (q1-q3)          | 7 (5-10) |      | 5 (3-8)  |      | 6 (4-9)  |      | 8 (6-12) |      |  |       |
| Transport time interval |          |      |          |      |          |      |          |      |  | <.001 |
| 0-3 min.                | 19642    | 15.2 | 4617     | 18.4 | 5927     | 15.1 | 9098     | 14.1 |  |       |
| 4-7 min.                | 54292    | 42.1 | 10305    | 41.1 | 16460    | 41.8 | 27527    | 42.7 |  |       |
| 8-11 min.               | 25945    | 20.1 | 4631     | 18.5 | 7785     | 19.8 | 13529    | 21.0 |  |       |
| 12-15 min.              | 12641    | 9.8  | 2256     | 9.0  | 3878     | 9.9  | 6507     | 10.1 |  |       |
| 15- min.                | 16368    | 12.7 | 3236     | 12.9 | 5316     | 13.5 | 7816     | 12.1 |  |       |
| Median (q1-q3)          | 7 (4-11) |      | 6 (4-11) |      | 7 (4-11) |      | 7 (4-11) |      |  |       |
| Airway management       |          |      |          |      |          |      |          |      |  | <.001 |
| ETI                     | 3758     | 2.9  | 388      | 1.5  | 846      | 2.1  | 2524     | 3.9  |  |       |
| SGA                     | 6483     | 5.0  | 596      | 2.4  | 908      | 2.3  | 4979     | 7.7  |  |       |
| BVM                     | 80896    | 62.8 | 11146    | 44.5 | 23967    | 60.9 | 45783    | 71.0 |  |       |
| PV                      | 37751    | 29.3 | 12915    | 51.6 | 13645    | 34.7 | 11191    | 17.4 |  |       |

1  
2  
3  
4  
5  
6  
7  
8  
9  
10  
11  
12  
13  
14  
15  
16  
17  
18  
19  
20  
21  
22  
23  
24  
25  
26  
27  
28  
29  
30  
31  
32  
33  
34  
35  
36  
37  
38  
39  
40  
41  
42  
43  
44  
45  
46  
47  
48  
49

|                       |       |      |       |      |       |      |       |      |       |       |
|-----------------------|-------|------|-------|------|-------|------|-------|------|-------|-------|
| Level of ED           |       |      |       |      |       |      |       |      |       | <.001 |
| Level 1               | 13972 | 10.8 | 2407  | 9.6  | 4252  | 10.8 | 7313  | 11.3 |       |       |
| Level 2               | 60469 | 46.9 | 10955 | 43.7 | 17515 | 44.5 | 31999 | 49.6 |       |       |
| Level 3               | 46452 | 36.0 | 9668  | 38.6 | 14931 | 37.9 | 21853 | 33.9 |       |       |
| Level 4               | 7995  | 6.2  | 2015  | 8.0  | 2668  | 6.8  | 3312  | 5.1  |       |       |
| Outcomes              |       |      |       |      |       |      |       |      |       |       |
| Prehospital ROSC      | 4722  | 3.7  | 243   | 1.0  | 837   | 2.1  | 3642  | 5.6  | <.001 |       |
| Survival to discharge | 6621  | 5.1  | 851   | 3.4  | 1908  | 4.8  | 3862  | 6.0  | <.001 |       |
| Good CPC              | 3200  | 2.5  | 287   | 1.1  | 682   | 1.7  | 2231  | 3.5  | <.001 |       |

VF/VT: ventricular fibrillation/ ventricular tachycardia, PEA: pulseless electrical activity, CPR: cardiopulmonary resuscitation, ETI: endotracheal intubation, SGA: supraglottic airway, BVM: bag-valve mask ventilation, PV: passive oxygen ventilation, ED: emergency department, ROSC: return of spontaneous circulation, CPC: cerebral performance category

Table 2 Age- and gender-standardized rates by year

| Year | Total<br>N | Survival to discharge |     |     |        |     | Good CPC |     |     |        |     |
|------|------------|-----------------------|-----|-----|--------|-----|----------|-----|-----|--------|-----|
|      |            | Yes                   | CSR | SSR | 95% CI |     | Yes      | CSR | SSR | 95% CI |     |
| 2006 | 6677       | 200                   | 3.0 | 2.6 | 2.3    | 3.0 | 63       | 0.9 | 0.8 | 0.6    | 1.0 |
| 2007 | 7525       | 270                   | 3.6 | 3.2 | 2.8    | 3.6 | 92       | 1.2 | 1.1 | 0.9    | 1.3 |
| 2008 | 10843      | 381                   | 3.5 | 3.3 | 2.9    | 3.6 | 132      | 1.2 | 1.1 | 0.9    | 1.3 |
| 2009 | 11963      | 552                   | 4.6 | 4.3 | 3.9    | 4.7 | 174      | 1.5 | 1.3 | 1.1    | 1.5 |
| 2010 | 13472      | 607                   | 4.5 | 4.4 | 4.0    | 4.7 | 195      | 1.4 | 1.4 | 1.2    | 1.6 |
| 2011 | 13931      | 749                   | 5.4 | 5.4 | 5.1    | 5.8 | 313      | 2.2 | 2.3 | 2.0    | 2.5 |
| 2012 | 14326      | 829                   | 5.8 | 5.9 | 5.5    | 6.3 | 382      | 2.7 | 2.7 | 2.5    | 3.0 |
| 2013 | 15567      | 927                   | 6.0 | 6.2 | 5.8    | 6.6 | 485      | 3.1 | 3.3 | 3.0    | 3.6 |
| 2014 | 16923      | 1027                  | 6.1 | 6.7 | 6.3    | 7.1 | 648      | 3.8 | 4.3 | 4.0    | 4.6 |
| 2015 | 17661      | 1079                  | 6.1 | 6.9 | 6.5    | 7.4 | 716      | 4.1 | 4.7 | 4.4    | 5.1 |

CSR; crude survival rate

SSR; age- and gender-standardized survival rate

Table 3 Trend analysis on distribution of risk factors on outcomes according to year

| Variables                         | All    | Year |      |       |       |       |       |       |       |       |       | P for trend* |
|-----------------------------------|--------|------|------|-------|-------|-------|-------|-------|-------|-------|-------|--------------|
|                                   |        | 2006 | 2007 | 2008  | 2009  | 2010  | 2011  | 2012  | 2013  | 2014  | 2015  |              |
| Total                             | 128888 | 6677 | 7525 | 10843 | 11963 | 13472 | 13931 | 14326 | 15567 | 16923 | 17661 |              |
| Crude incidence rate per 100,000* |        | 18.2 | 19.4 | 28.1  | 30.5  | 33.4  | 33.3  | 35.8  | 37.9  | 39.7  | 41.1  |              |
| Age group                         |        |      |      |       |       |       |       |       |       |       |       | <.001        |
| 15-39, years                      | 5.4    | 7.7  | 7.4  | 7.1   | 6.7   | 6.0   | 4.7   | 4.9   | 4.7   | 4.4   | 4.0   |              |
| 40-59, years                      | 26.0   | 29.7 | 29.7 | 29.7  | 28.6  | 26.8  | 25.5  | 25.9  | 25.1  | 23.1  | 22.1  |              |
| 60-79, years                      | 46.1   | 46.8 | 46.8 | 46.2  | 46.3  | 46.8  | 47.0  | 46.2  | 45.7  | 45.2  | 44.9  |              |
| 80-, years                        | 22.6   | 15.8 | 16.1 | 17.1  | 18.3  | 20.5  | 22.8  | 23.0  | 24.4  | 27.3  | 29.0  |              |
| Gender                            |        |      |      |       |       |       |       |       |       |       |       | <.001        |
| Female                            | 35.6   | 34.5 | 33.6 | 35.1  | 34.0  | 35.4  | 35.5  | 36.2  | 35.7  | 37.0  | 36.7  |              |
| Male                              | 64.4   | 65.5 | 66.4 | 64.9  | 66.0  | 64.6  | 64.5  | 63.8  | 64.3  | 63.0  | 63.3  |              |
| Metropolis                        |        |      |      |       |       |       |       |       |       |       |       | 0.497        |
| Non-metropolis                    | 57.6   | 59.3 | 57.3 | 57.0  | 56.9  | 57.6  | 58.7  | 57.7  | 56.8  | 57.4  | 57.7  |              |
| Metropolis                        | 42.4   | 40.7 | 42.7 | 43.0  | 43.1  | 42.4  | 41.3  | 42.3  | 43.2  | 42.6  | 42.3  |              |
| Place                             |        |      |      |       |       |       |       |       |       |       |       | <.001        |
| Public                            | 20.4   | 38.5 | 34.7 | 20.6  | 19.4  | 18.2  | 19.0  | 18.8  | 18.0  | 17.5  | 17.0  |              |
| Private                           | 78.5   | 60.6 | 62.8 | 78.3  | 79.7  | 81.1  | 80.2  | 80.1  | 80.9  | 81.3  | 81.9  |              |
| Unknown                           | 1.1    | 0.9  | 2.5  | 1.1   | 0.9   | 0.8   | 0.9   | 1.1   | 1.1   | 1.2   | 1.1   |              |
| Primary ECG                       |        |      |      |       |       |       |       |       |       |       |       | <.001        |
| VF/pulseless VT                   | 6.7    | 4.5  | 5.8  | 5.5   | 4.1   | 3.8   | 4.4   | 8.8   | 8.8   | 8.6   | 8.7   |              |
| PEA                               | 5.6    | 2.4  | 3.1  | 4.7   | 4.1   | 4.6   | 5.3   | 6.4   | 6.8   | 6.6   | 7.8   |              |
| Asystole                          | 87.7   | 93.1 | 91.1 | 89.8  | 91.8  | 91.5  | 90.3  | 84.8  | 84.3  | 84.7  | 83.5  |              |
| Witnessed                         |        |      |      |       |       |       |       |       |       |       |       | <.001        |
| No                                | 55.3   | 53.9 | 53.7 | 51.2  | 53.1  | 54.9  | 53.9  | 55.5  | 59.1  | 57.5  | 56.2  |              |
| Yes                               | 44.7   | 46.1 | 46.3 | 48.8  | 46.9  | 45.1  | 46.1  | 44.5  | 40.9  | 42.5  | 43.8  |              |
| Bystander CPR                     |        |      |      |       |       |       |       |       |       |       |       | <.001        |
| No                                | 91.6   | 98.8 | 97.7 | 97.8  | 96.4  | 95.7  | 93.8  | 91.3  | 89.1  | 84.7  | 83.6  |              |
| Yes                               | 8.4    | 1.2  | 2.3  | 2.2   | 3.6   | 4.3   | 6.2   | 8.7   | 10.9  | 15.3  | 16.4  |              |
| Season                            |        |      |      |       |       |       |       |       |       |       |       | 0.338        |
| MAR.-MAY                          | 25.4   | 24.8 | 24.9 | 24.3  | 25.6  | 26.1  | 25.7  | 24.6  | 25.4  | 25.3  | 26.4  |              |
| JUN.-AUG                          | 21.9   | 23.9 | 22.3 | 22.3  | 23.0  | 21.4  | 22.0  | 21.2  | 21.3  | 21.5  | 21.5  |              |
| SEP.-NOV                          | 17.1   | 16.9 | 17.1 | 17.7  | 17.2  | 17.1  | 16.5  | 17.2  | 17.5  | 17.1  | 16.5  |              |

|  |                         |      |      |      |      |      |      |      |      |      |      |      |       |
|--|-------------------------|------|------|------|------|------|------|------|------|------|------|------|-------|
|  | DEC-FEB                 | 35.7 | 34.4 | 35.7 | 35.7 | 34.2 | 35.4 | 35.8 | 37.0 | 35.9 | 36.2 | 35.6 |       |
|  | Weekend                 |      |      |      |      |      |      |      |      |      |      |      | 0.083 |
|  | Weekday                 | 70.4 | 69.3 | 70.1 | 70.2 | 70.2 | 70.7 | 70.1 | 71.0 | 70.2 | 70.8 | 70.5 |       |
|  | Weekend                 | 29.6 | 30.7 | 29.9 | 29.8 | 29.8 | 29.3 | 29.9 | 29.0 | 29.8 | 29.2 | 29.5 |       |
|  | Hour of the event       |      |      |      |      |      |      |      |      |      |      |      | 0.000 |
|  | 0-5 hour                | 14.8 | 15.5 | 14.7 | 14.8 | 15.2 | 15.3 | 14.9 | 15.2 | 14.5 | 14.5 | 14.4 |       |
|  | 6-11 hour               | 32.4 | 30.7 | 31.0 | 31.3 | 31.6 | 32.1 | 32.6 | 32.4 | 33.1 | 33.0 | 33.5 |       |
|  | 12-17 hour              | 28.5 | 27.6 | 28.4 | 28.7 | 28.9 | 27.9 | 28.6 | 28.9 | 28.5 | 28.7 | 28.4 |       |
|  | 18-23 hour              | 24.3 | 26.2 | 25.9 | 25.3 | 24.3 | 24.7 | 24.0 | 23.4 | 23.9 | 23.8 | 23.7 |       |
|  | Level of EMT            |      |      |      |      |      |      |      |      |      |      |      | <.001 |
|  | Level 1                 | 69.8 | 50.2 | 53.7 | 50.6 | 53.2 | 55.9 | 73.2 | 73.0 | 80.1 | 84.6 | 88.8 |       |
|  | Level 2                 | 25.2 | 33.8 | 34.8 | 41.1 | 40.3 | 38.0 | 23.7 | 23.0 | 16.2 | 13.4 | 10.4 |       |
|  | Level 3                 | 5.0  | 16.0 | 11.4 | 8.3  | 6.6  | 6.1  | 3.0  | 4.0  | 3.7  | 2.0  | 0.8  |       |
|  | No of ambulance crew    |      |      |      |      |      |      |      |      |      |      |      | <.001 |
|  | 1                       | 12.6 | 36.7 | 29.2 | 17.1 | 10.9 | 16.3 | 6.6  | 10.1 | 13.6 | 7.0  | 2.9  |       |
|  | 2                       | 68.5 | 50.7 | 54.6 | 72.9 | 77.1 | 71.9 | 70.6 | 68.5 | 65.9 | 70.4 | 68.6 |       |
|  | 3                       | 19.0 | 12.6 | 16.3 | 9.9  | 11.9 | 11.8 | 22.8 | 21.3 | 20.6 | 22.6 | 28.5 |       |
|  | Response time interval  |      |      |      |      |      |      |      |      |      |      |      | <.001 |
|  | 0-3 min.                | 8.0  | 13.1 | 11.4 | 9.9  | 8.7  | 8.9  | 9.0  | 7.5  | 7.2  | 6.5  | 4.0  |       |
|  | 4-7 min.                | 51.8 | 55.1 | 56.3 | 54.7 | 53.6 | 54.2 | 53.8 | 53.7 | 50.3 | 49.1 | 44.5 |       |
|  | 8-11 min.               | 24.7 | 19.9 | 20.3 | 22.2 | 23.6 | 22.4 | 22.6 | 23.5 | 24.9 | 27.3 | 32.1 |       |
|  | 12-15 min.              | 8.8  | 6.6  | 6.4  | 7.1  | 7.7  | 8.0  | 8.3  | 8.4  | 9.8  | 10.0 | 11.8 |       |
|  | 15- min.                | 6.8  | 5.3  | 5.6  | 6.1  | 6.5  | 6.5  | 6.3  | 6.8  | 7.7  | 7.1  | 7.7  |       |
|  | Scene time interval     |      |      |      |      |      |      |      |      |      |      |      | <.001 |
|  | 0-3 min.                | 16.7 | 32.0 | 30.4 | 29.2 | 24.8 | 22.0 | 18.3 | 14.9 | 9.5  | 8.2  | 2.4  |       |
|  | 4-7 min.                | 36.9 | 40.0 | 40.4 | 41.4 | 41.7 | 42.7 | 41.2 | 38.5 | 36.2 | 35.4 | 21.2 |       |
|  | 8-11 min.               | 26.9 | 17.2 | 17.7 | 18.5 | 21.1 | 22.0 | 24.8 | 27.3 | 32.2 | 32.1 | 39.1 |       |
|  | 12-15 min.              | 11.7 | 6.1  | 7.1  | 6.7  | 7.5  | 8.4  | 9.7  | 12.3 | 13.9 | 15.0 | 20.2 |       |
|  | 15- min.                | 7.8  | 4.7  | 4.5  | 4.2  | 4.9  | 4.9  | 6.1  | 7.0  | 8.2  | 9.3  | 17.1 |       |
|  | Transport time interval |      |      |      |      |      |      |      |      |      |      |      | <.001 |
|  | 0-3 min.                | 15.2 | 17.1 | 17.9 | 19.6 | 16.1 | 14.7 | 14.5 | 13.0 | 12.7 | 13.8 | 16.6 |       |
|  | 4-7 min.                | 42.1 | 42.4 | 41.9 | 39.9 | 42.0 | 41.9 | 41.5 | 42.3 | 42.9 | 42.8 | 42.7 |       |
|  | 8-11 min.               | 20.1 | 18.4 | 18.5 | 18.6 | 19.3 | 19.9 | 20.1 | 21.3 | 21.4 | 21.2 | 20.2 |       |
|  | 12-15 min.              | 9.8  | 9.3  | 8.5  | 9.2  | 9.5  | 9.7  | 10.3 | 10.2 | 10.2 | 10.3 | 9.8  |       |
|  | 15- min.                | 12.7 | 12.9 | 13.2 | 12.7 | 13.0 | 13.9 | 13.6 | 13.2 | 12.9 | 12.0 | 10.7 |       |

1  
2  
3  
4  
5  
6  
7  
8  
9  
10  
11  
12  
13  
14  
15  
16  
17  
18  
19  
20  
21  
22  
23  
24  
25  
26  
27  
28  
29  
30  
31  
32  
33  
34  
35  
36  
37  
38  
39  
40  
41  
42  
43  
44  
45  
46  
47  
48  
49

|                   |      |      |      |      |      |      |      |      |      |      |      |  |       |
|-------------------|------|------|------|------|------|------|------|------|------|------|------|--|-------|
| Airway management |      |      |      |      |      |      |      |      |      |      |      |  | <.001 |
| ETI               | 2.9  | 1.3  | 1.8  | 1.6  | 1.9  | 1.8  | 2.7  | 2.5  | 2.6  | 3.7  | 6.5  |  |       |
| SGA               | 5.0  | 2.3  | 2.4  | 2.4  | 2.3  | 1.8  | 2.8  | 3.2  | 4.8  | 8.9  | 12.9 |  |       |
| BVM               | 62.8 | 38.0 | 44.7 | 48.4 | 52.4 | 56.8 | 72.2 | 73.6 | 70.9 | 70.9 | 69.2 |  |       |
| PV                | 29.3 | 58.4 | 51.1 | 47.7 | 43.5 | 39.6 | 22.3 | 20.8 | 21.8 | 16.6 | 11.4 |  |       |
| Level of ED       |      |      |      |      |      |      |      |      |      |      |      |  | <.001 |
| Level 1           | 10.8 | 10.1 | 9.6  | 9.4  | 10.1 | 10.0 | 12.1 | 11.8 | 11.5 | 10.8 | 11.3 |  |       |
| Level 2           | 46.9 | 41.8 | 44.2 | 44.6 | 45.9 | 43.7 | 44.1 | 46.6 | 48.7 | 50.6 | 51.9 |  |       |
| Level 3           | 36.0 | 39.6 | 38.3 | 38.2 | 36.8 | 37.9 | 39.0 | 36.8 | 35.4 | 33.0 | 31.1 |  |       |
| Level 4           | 6.2  | 8.5  | 8.0  | 7.8  | 7.2  | 8.4  | 4.8  | 4.8  | 4.3  | 5.6  | 5.7  |  |       |

VF/VT: ventricular fibrillation/ ventricular tachycardia, PEA: pulseless electrical activity, CPR: cardiopulmonary resuscitation, ETI: endotracheal intubation, SGA: supraglottic airway, BVM: bag-valve mask ventilation, PV: passive oxygen ventilation, ED: emergency department, ROSC: return of spontaneous circulation, CPC: cerebral performance category

\*P for trends were tested using the Cochran-Armitage test.

\*\*Crude incidence rate=(total number of OHCA of each year/total number population of each year)\*100,000. The OHCA includes the all causes of OHCA and all gender and age groups.



Table 4. Multivariable logistic regression analysis for outcomes of study phase comparing with control phase

| Outcomes              | Group   | Total<br>N | Outcome |     | Model 1 |        |      | Model 2 |        |      |
|-----------------------|---------|------------|---------|-----|---------|--------|------|---------|--------|------|
|                       |         |            | n       | %   | AOR     | 95% CI |      | AOR     | 95% CI |      |
| Good CPC              |         |            |         |     |         |        |      |         |        |      |
|                       | Control | 25045      | 287     | 1.1 | 1.00    |        |      | 1.00    |        |      |
|                       | Phase 1 | 39366      | 682     | 1.7 | 1.75    | 1.48   | 2.07 | 1.82    | 1.53   | 2.15 |
|                       | Phase 2 | 64477      | 2231    | 3.5 | 1.97    | 1.59   | 2.43 | 2.21    | 1.78   | 2.75 |
| Survival to discharge |         |            |         |     |         |        |      |         |        |      |
|                       | Control | 25045      | 851     | 3.4 | 1.00    |        |      | 1.00    |        |      |
|                       | Phase 1 | 39366      | 1908    | 4.8 | 1.73    | 1.57   | 1.90 | 1.79    | 1.62   | 1.98 |
|                       | Phase 2 | 64477      | 3862    | 6.0 | 1.54    | 1.36   | 1.76 | 1.78    | 1.56   | 2.04 |
| Prehospital ROSC      |         |            |         |     |         |        |      |         |        |      |
|                       | Control | 25045      | 243     | 1.0 | 1.00    |        |      | 1.00    |        |      |
|                       | Phase 1 | 39366      | 837     | 2.1 | 2.21    | 1.87   | 2.60 | 2.20    | 1.86   | 2.59 |
|                       | Phase 2 | 64477      | 3642    | 5.6 | 3.58    | 2.94   | 4.36 | 3.47    | 2.84   | 4.24 |

AOR: adjusted odd ratio, 95% CI: 95% confidence interval

Good CPC: cerebral performance scale 1 or 2

ROSC: return of spontaneous circulation

Model 1: adjusted for implemented guideline, gender, age group, metropolis, place of the event, witness, primary ECG, date and time of event (season, weekend, hour).

Model 2: adjusted for implemented guideline, gender, age group, metropolis, place of the event, witness, primary ECG, date and time of event (season, weekend, hour), level of emergency medical technician, number of ambulance crew, response time interval, scene time interval, transport time interval, airway management method, level of emergency department transported to.

Table 5 Interaction analysis for comparison of the effect size by study phase according to bystander cardiopulmonary resuscitation

| Outcome               | Group   | Bystander CPR (-) |        |      | Bystander CPR (+) |        |      | P value for interaction |
|-----------------------|---------|-------------------|--------|------|-------------------|--------|------|-------------------------|
|                       |         | AOR               | 95% CI |      | AOR               | 95% CI |      |                         |
| Good CPC              |         |                   |        |      |                   |        |      |                         |
|                       | Control | 1.00              |        |      | 1.00              |        |      |                         |
|                       | Phase 1 | 1.62              | 1.36   | 1.93 | 3.33              | 1.87   | 5.92 | 0.017                   |
|                       | Phase 2 | 1.87              | 1.49   | 2.33 | 3.47              | 1.97   | 6.10 | 0.029                   |
| Survival to discharge |         |                   |        |      |                   |        |      |                         |
|                       | Control | 1.00              |        |      | 1.00              |        |      |                         |
|                       | Phase 1 | 1.70              | 1.54   | 1.88 | 2.49              | 1.69   | 3.68 | 0.058                   |
|                       | Phase 2 | 1.62              | 1.41   | 1.85 | 2.25              | 1.54   | 3.28 | 0.082                   |
| Prehospital ROSC      |         |                   |        |      |                   |        |      |                         |
|                       | Control | 1.00              |        |      | 1.00              |        |      |                         |
|                       | Phase 1 | 2.03              | 1.72   | 2.41 | 2.99              | 1.70   | 5.26 | 0.194                   |
|                       | Phase 2 | 3.25              | 2.65   | 3.99 | 3.41              | 1.96   | 5.93 | 0.868                   |

AOR: adjusted odd ratio, 95% CI: 95% confidence interval

Good CPC: cerebral performance scale 1 or 2

ROSC: return of spontaneous circulation

Adjusted for implemented guideline, gender, age group, metropolis, place of the event, witness, primary ECG, date and time of event (season, weekend, hour), level of emergency medical technician, number of ambulance crew, response time interval, scene time interval, transport time interval, airway management method, level of emergency department transported, bystander cardiopulmonary resuscitation (CPR), and interaction term (phase\*bystander CPR).

Table 6. Multivariable logistic regression analysis for outcomes of study phase comparing with control phase for the Utstein population with cardiac etiology, witness status, and shockable rhythm

| Outcomes              | Group   | Total<br>N | Outcome |      | Model 1  |        |       | Model 2     |        |       |
|-----------------------|---------|------------|---------|------|----------|--------|-------|-------------|--------|-------|
|                       |         |            | n       | %    | Crude OR | 95% CI |       | Adjusted OR | 95% CI |       |
| Good CPC              |         |            |         |      |          |        |       |             |        |       |
|                       | Control | 968        | 110     | 11.4 | 1.00     |        |       | 1.00        |        |       |
|                       | Phase 1 | 1115       | 146     | 13.1 | 1.28     | 0.98   | 1.68  | 1.32        | 1.00   | 1.75  |
|                       | Phase 2 | 3960       | 1439    | 36.3 | 5.31     | 4.28   | 6.60  | 5.76        | 4.56   | 7.28  |
| Survival to discharge |         |            |         |      |          |        |       |             |        |       |
|                       | Control | 968        | 222     | 22.9 | 1.00     |        |       | 1.00        |        |       |
|                       | Phase 1 | 1115       | 271     | 24.3 | 1.17     | 0.95   | 1.44  | 1.22        | 0.98   | 1.51  |
|                       | Phase 2 | 3960       | 1799    | 45.4 | 3.28     | 2.76   | 3.89  | 3.79        | 3.14   | 4.58  |
| Prehospital ROSC      |         |            |         |      |          |        |       |             |        |       |
|                       | Control | 968        | 53      | 5.5  | 1.00     |        |       | 1.00        |        |       |
|                       | Phase 1 | 1115       | 64      | 5.7  | 1.12     | 0.77   | 1.63  | 1.09        | 0.74   | 1.60  |
|                       | Phase 2 | 3960       | 1781    | 45.0 | 16.51    | 12.38  | 22.02 | 14.36       | 10.66  | 19.36 |

AOR: adjusted odd ratio, 95% CI: 95% confidence interval

Good CPC: cerebral performance scale 1 or 2

ROSC: return of spontaneous circulation

Model 1: adjusted for implemented guideline, gender, age group, metropolis, place of the event, witness, primary ECG, date and time of event (season, weekend, hour).

Model 2: adjusted for implemented guideline, gender, age group, metropolis, place of the event, witness, primary ECG, date and time of event (season, weekend, hour), level of emergency medical technician, number of ambulance crew, response time interval, scene time interval, transport time interval, airway management method, level of emergency department transported to.

1  
2  
3  
4  
5  
6  
7  
8  
9  
10  
11  
12  
13  
14  
15  
16  
17  
18  
19  
20  
21  
22  
23  
24  
25  
26  
27  
28  
29  
30  
31  
32  
33  
34  
35  
36  
37  
38  
39  
40  
41  
42  
43  
44  
45  
46  
47  
48  
49

For peer review only

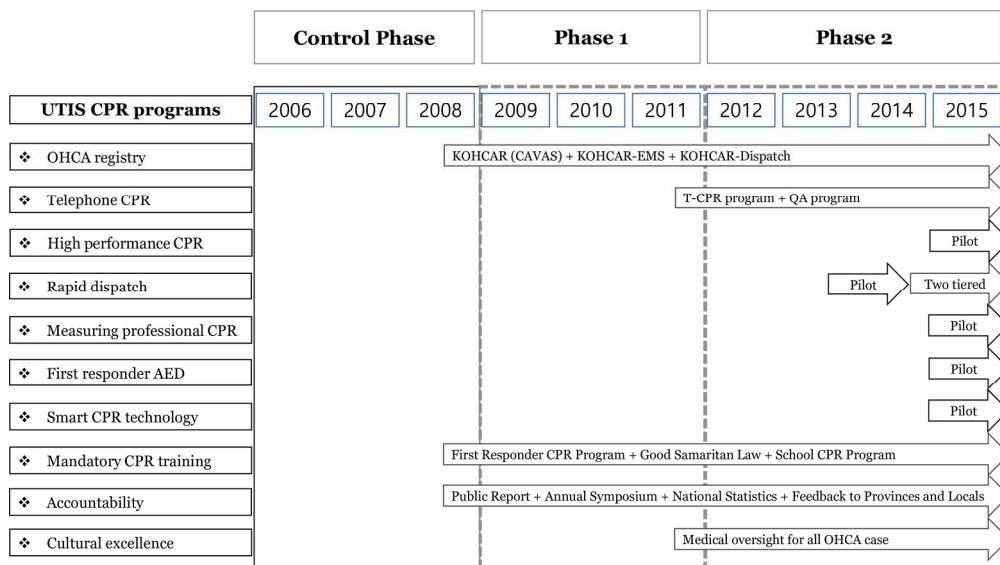

Figure 1 National Implementation of Utstein Ten-step Implementation Strategy by study period

CPR: cardiopulmonary resuscitation  
 AED: automatic external defibrillation  
 KOHCAR: Korea out-of-hospital cardiac arrest registry  
 EMS: emergency medical services  
 T-CPR: telephone-assisted CPR  
 OA: quality assurance  
 OHCA: out-of-hospital cardiac arrest

190x106mm (300 x 300 DPI)

Peer review only

1  
2  
3  
4  
5  
6  
7  
8  
9  
10  
11  
12  
13  
14  
15  
16  
17  
18  
19  
20  
21  
22  
23  
24  
25  
26  
27  
28  
29  
30  
31  
32  
33  
34  
35  
36  
37  
38  
39  
40  
41  
42  
43  
44  
45  
46  
47  
48  
49  
50  
51  
52  
53  
54  
55  
56  
57  
58  
59  
60

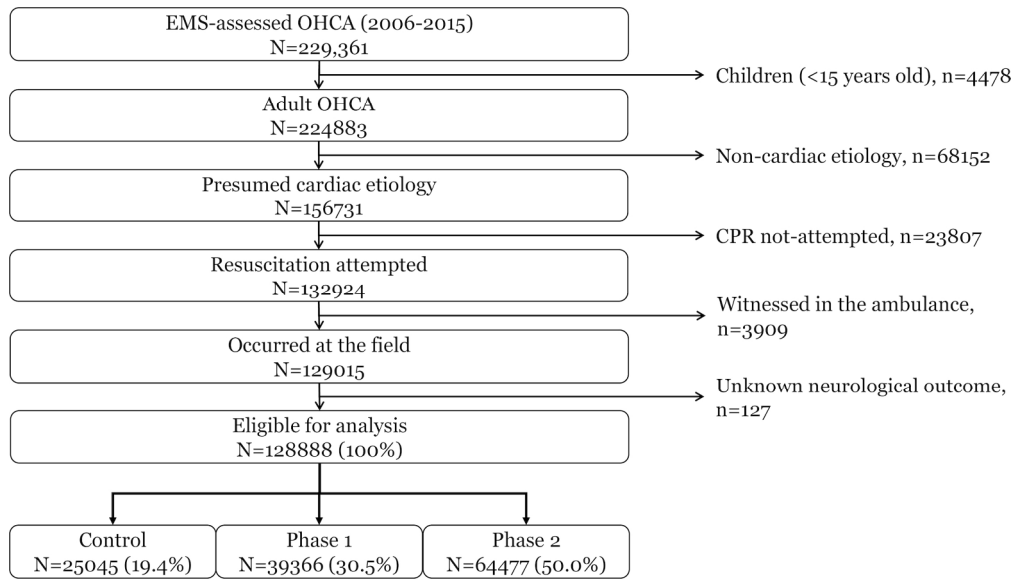

Figure 2 Study subjects  
 EMS: emergency medical service  
 OHCA: out-of-hospital cardiac arrest  
 CPR: cardiopulmonary resuscitation

190x108mm (300 x 300 DPI)

view only

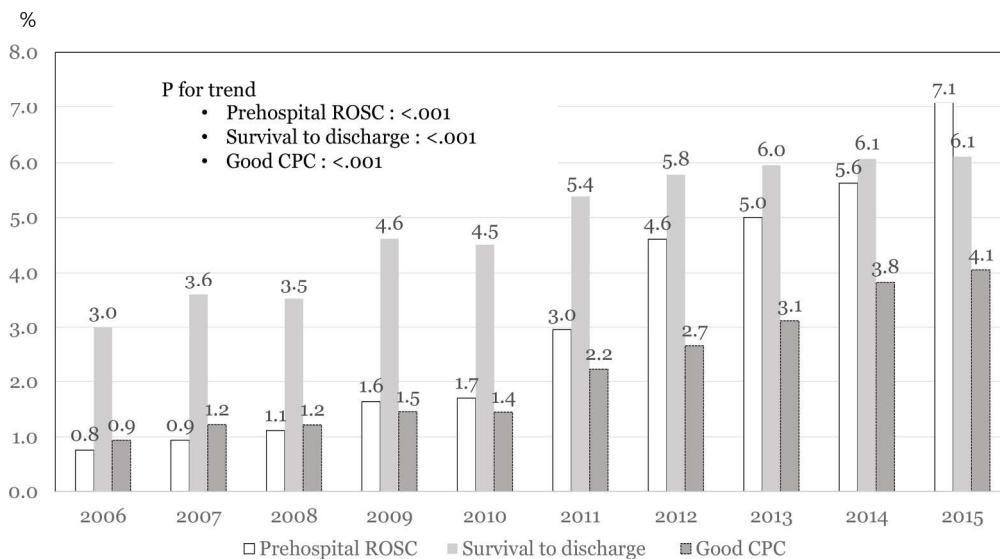

Figure 3 Longitudinal trend of outcomes in out-of-hospital cardiac arrest in Korea  
 ROSC: return of spontaneous circulation  
 CPC: cerebral performance scale

190x104mm (300 x 300 DPI)

review only

## Appendix 1. Utstein ten-steps implementation strategy (UTIS)

Step 1. Do you have a **community-based cardiac arrest registry**?

- No
- Yes, started in (□□□□)

If yes, please check the implementation status according to the notes below:

- Minimal status is defined as the registry has *NEITHER* quality assurance program *NOR* sufficient information on 2014 Utstein template information
- Moderate status is defined as the registry has *EITHER* quality assurance program *OR* sufficient information on 2014 Utstein template information
- Full status is defined as the registry has *BOTH* quality assurance program *AND* sufficient information on 2014 Utstein template information

*Notes:*

- ※ Community-based cardiac arrest registry means that the registry has been continuously maintained with regularity and basic information on OHCA and CPR covering the whole community.
- ※ Quality assurance program includes 1) standard data dictionary for the variables 2) regular data quality management and 3) education and training for data coordinator and providers.
- ※ Sufficient information on 2014 Utstein template includes the registry has most factors on system, individual, structure, process, and outcomes.

Step 2. Do you have a **telephone CPR program**?

- No
- Yes, started in (□□□□)

If yes, please check the implementation status according to the notes below:

- Minimal status is defined as the registry has *NEITHER* quality assurance program *NOR* telephone CPR registry
- Moderate status is defined as the registry has *EITHER* quality assurance program *OR* telephone CPR registry
- Full status is defined as the registry has *BOTH* quality assurance program *AND* telephone CPR registry



Notes

- ※ Telephone CPR program means that a community dispatch center provides dispatcher-assisted CPR instruction program when a call is recognized as a case of cardiac arrest.
- ※ Quality assurance program includes 1) dispatch protocol, 2) dispatcher training, 3) audio-tape review and feedback.
- ※ Telephone CPR registry includes the caller information, dispatch time variable, process variable, and CPR instruction.

Step 3. Do you have a **high performance CPR program**?

No

Yes, started in (□□□□)

If yes, please check the implementation status according to the notes below:

- Minimal status is defined as the registry has *NEITHER* high performance CPR training program *NOR* quality assurance program using an objective measurement tool.
- Moderate status is defined as the registry has *EITHER* high performance CPR training program *NOR* quality assurance program using an objective measurement tool.
- Full status is defined as the registry has *BOTH* high performance CPR training program *AND* quality assurance program using an objective measurement tool.

Notes

- ※ High performance (HP) CPR program means that the community encourages providers to perform HP CPR on 1) correct hand position, 2) compression rate of 100-120 beats per minute, 3) depth of compression of 2 inches (5-6 cm), 4) full recoil on the upstroke, 5) 50:50 duty cycles, 6) ventilations of one second each, 7) minimal interruptions of CPR (no pause to exceed 10 seconds), and 8) intubation and IV start without pausing chest compressions.
- ※ High performance CPR training includes the system provides a special education and team training with providers regularly.
- ※ Quality assurance program includes the regular review of team CPR and get feedback to providers.

1  
2  
3  
4 Step 4. Do you have a **rapid dispatch program**?

- 5  
6  No  
7  
8  Yes, started in (□□□□)

9  
10 If yes, please check the implementation status according to the notes below:

- 11  
12  Minimal status is defined as the rapid dispatch program has *NEITHER* rapid dispatch indication  
13 and protocol *NOR* quality assurance program.  
14  
15  Moderate status is defined as the rapid dispatch program has *EITHER* rapid dispatch indication  
16 and protocol *OR* quality assurance program.  
17  
18  Full status is defined as the rapid dispatch program has *BOTH* rapid dispatch indication and  
19 protocol *AND* quality assurance program.  
20  
21  
22  
23

24 **Notes**

- 25  
26 ※ Rapid dispatch program means that the community sends available vehicles and services  
27 responding to OHCA quickly within a critical time interval (such as 60 seconds)  
28  
29 ※ Rapid dispatch indication and protocol includes target emergency condition and dispatch  
30 protocol for available vehicles and providers such as tiered response to shorten the time process.  
31  
32 ※ Quality assurance program includes the regular training and education of dispatcher, regular  
33 review of dispatch record, and on-going feedback to the providers.  
34  
35  
36  
37  
38

39  
40 Step 5. Do you have a **measurement program of professional resuscitation** using high  
41 technology device?  
42

- 43  
44  No  
45  
46  Yes, started in (□□□□)

47  
48 If yes, please check the implementation status according to the notes below:

- 49  
50  Minimal status is defined as the professional CPR measurement has *NEITHER* high  
51 technology devices *NOR* quality assurance program.  
52  
53  Moderate status is defined as the professional CPR measurement has *EITHER* high technology  
54 devices *OR* quality assurance program.  
55  
56  Full status is defined as the professional CPR measurement has *BOTH* high technology devices  
57  
58 *AND* quality assurance program.  
59  
60

*Notes*

- ※ The professional CPR measurement means that the providers use the high technology defibrillator devices which can provide information on a full range of CPR quality.
- ※ High technology devices include function of measuring depth, rate, pause, no-flow time objectively and continuously and function for audio-recording system, memory, and data downloading.
- ※ Quality assurance program includes the data collection from devices, analysis, providing feedback with providers, regularly.

Step 6. Do you have a **first responder (policemen or safety guards) AED program?**

- No
- Yes, started in (□□□□)

If yes, please check the implementation status according to the notes below:

- Minimal status is defined as the first responder AED program has *NEITHER* education and training on first responder AED *NOR* quality assurance program of first responder defibrillation.
- Moderate status is defined as the first responder AED program has *EITHER* education and training on first responder AED *OR* quality assurance program of first responder defibrillation.
- Full status is defined as the first responder AED program has *BOTH* education and training on first responder AED *AND* quality assurance program of first responder defibrillation.

*Notes*

- ※ The first responder AED program means that the community encourages policemen or safety guards to use AED by law or voluntary-based.
- ※ The first responder AED training/ education includes a regular education and training program on AED use and response for police and safety guards.
- ※ Quality assurance program includes the data collection from devices and analysis of first responder AED use and providing feedback with the first responders, regularly.

Step 7. Do you use a **smart technology to activate layperson to provide CPR and use public access defibrillator (PAD)?**

- 1  
2  
3  
4  No  
5  
6  Yes, started in (□□□□)  
7

8 If yes, please check the implementation status according to the notes below:  
9

- 10  Minimal status is defined as smart technology program for CPR and PAD has *NEITHER* an  
11 advanced technology for geographical information *NOR* an activation program for layperson  
12 CPR and PAD.  
13  
14  Moderate status is defined as smart technology program for CPR and PAD has *EITHER* an  
15 advanced technology for geographical information *OR* an activation program for layperson  
16 CPR and PAD.  
17  
18  Full status is defined as smart technology program for CPR and PAD has *BOTH* an advanced  
19 technology for geographical information *AND* an activation program for layperson CPR and  
20 PAD.  
21  
22  
23  
24  
25  
26  
27

28 *Notes*

- 29  
30 ※ Smart technology program for CPR and PAD means that the community has program activate  
31 lay person to provide CPR and defibrillation using PAD via geographic information and  
32 activation program of layperson volunteer.  
33  
34 ※ An advanced technology for geographical information includes special geographic information  
35 technology to let layperson identify the location of OHCA and the nearest PAD.  
36  
37 ※ The activation of layperson for CPR and PAD includes the dispatch centers activate layperson  
38 volunteer for providing CPR and defibrillation with OHCA located in the nearest area.  
39  
40  
41  
42  
43  
44

45  
46 Step 8. Do you have a **mandatory CPR training** in schools and other community areas in addition  
47 to first responders?  
48

- 49  No  
50  
51  Yes, started in (□□□□)  
52

53 If yes, please check the implementation status according to the notes below:  
54

- 55  Minimal status is defined as the mandatory CPR training covers *NEITHER* school *NOR* the  
56 other areas such as driver license applicants.  
57  
58  Moderate status is defined as the mandatory CPR training covers *EITHER* school *OR* the other  
59 areas such as driver license applicants.  
60

- 1  
2  
3  
4  
5  
6  
7
- Full status is defined as the mandatory CPR training covers *BOTH* school *AND* the other areas such as driver license applicants.

8  
9

*Notes*

- 10  
11  
12  
13  
14  
15  
16  
17  
18  
19  
20  
21  
22
- ※ The mandatory CPR training means the community has law for obligatory CPR training in schools and other areas such as driver license applicants.
  - ※ The mandatory school CPR includes regular program for CPR training for students and teachers based on an Act, Law, or Regulation.
  - ※ The mandatory training program for other areas includes obligatory training for driver license applicants.

23  
24  
25

Step 9. Do you think your community has an **accountability on OHCA and CPR** outcomes?

- 26  
27  
28  
29
- No
- Yes, started in (□□□□)

30  
31

If yes, please check the implementation status according to the notes below:

- 32  
33  
34  
35  
36  
37  
38  
39  
40  
41  
42  
43  
44  
45  
46  
47  
48  
49
- Minimal status is defined when *NEITHER* the community reports OHCA information and CPR outcomes to the public annually *NOR* the community organizations share the information sufficiently.
  - Moderate status is defined when *EITHER* the community reports OHCA information and CPR outcomes to the public annually *OR* the community organizations share the information sufficiently.
  - Full status is defined when *BOTH* the community reports OHCA information and CPR outcomes to the public annually *AND* the community organizations share the information sufficiently.

50  
51

*Notes*

- 52  
53  
54  
55  
56  
57  
58  
59  
60
- ※ The accountability on OHCA and CPR outcomes means the community reports OHCA information and CPR outcomes to the public annually and involved organizations share the information sufficiently.
  - ※ Public reports includes the annual incidence, outcomes by rhythms, locations, bystander CPR, PAD use, and response time.

1  
2  
3  
4  
5  
6  
7  
8  
9  
10  
11  
12  
13  
14  
15  
16  
17  
18  
19  
20  
21  
22  
23  
24  
25  
26  
27  
28  
29  
30  
31  
32  
33  
34  
35  
36  
37  
38  
39  
40  
41  
42  
43  
44  
45  
46  
47  
48  
49  
50  
51  
52  
53  
54  
55  
56  
57  
58  
59  
60

※ Information sharing includes the organizations communicate with each other, and exchange information and data for CPR program.

Step 10. Do you think your community has a **cultural excellence** for improving CPR outcomes?

No

Yes, started in (□□□□)

If yes, please check the implementation status according to the notes below:

Minimal status is defined when *NEITHER* the medical directors play the key role for system development *NOR* host CPR-related meetings regularly.

Moderate status is defined when *EITHER* the medical directors play the key role for system development *OR* host CPR-related meetings regularly.

Full status is defined when *BOTH* the medical directors play the key role for system development *AND* host CPR-related meetings regularly.

*Notes*

※ The cultural excellence means the medical directors are actively engaged in system development, protocol, education, and quality assurance program and meet with community leaders regularly for communication, collaboration, and coordination to establish the best practice.

※ The role of medical directors includes system development, education and training, certification, and quality assurance program.

※ Leadership meeting indicates the meeting of organization leaders to meet and communicate with each other regularly for improving CPR outcomes.

## STROBE Statement—checklist of items that should be included in reports of observational studies

|                              | Item No | Recommendation                                                                                                                                                                                                                                                                                                                                                                                                                                                         | Page |
|------------------------------|---------|------------------------------------------------------------------------------------------------------------------------------------------------------------------------------------------------------------------------------------------------------------------------------------------------------------------------------------------------------------------------------------------------------------------------------------------------------------------------|------|
| <b>Title and abstract</b>    | 1       | (a) Indicate the study's design with a commonly used term in the title or the abstract                                                                                                                                                                                                                                                                                                                                                                                 | P1   |
|                              |         | (b) Provide in the abstract an informative and balanced summary of what was done and what was found                                                                                                                                                                                                                                                                                                                                                                    | P3   |
| <b>Introduction</b>          |         |                                                                                                                                                                                                                                                                                                                                                                                                                                                                        |      |
| Background/rationale         | 2       | Explain the scientific background and rationale for the investigation being reported                                                                                                                                                                                                                                                                                                                                                                                   | P5   |
| Objectives                   | 3       | State specific objectives, including any prespecified hypotheses                                                                                                                                                                                                                                                                                                                                                                                                       | P5   |
| <b>Methods</b>               |         |                                                                                                                                                                                                                                                                                                                                                                                                                                                                        |      |
| Study design                 | 4       | Present key elements of study design early in the paper                                                                                                                                                                                                                                                                                                                                                                                                                | P5   |
| Setting                      | 5       | Describe the setting, locations, and relevant dates, including periods of recruitment, exposure, follow-up, and data collection                                                                                                                                                                                                                                                                                                                                        | P6   |
| Participants                 | 6       | (a) <i>Cohort study</i> —Give the eligibility criteria, and the sources and methods of selection of participants. Describe methods of follow-up<br><i>Case-control study</i> —Give the eligibility criteria, and the sources and methods of case ascertainment and control selection. Give the rationale for the choice of cases and controls<br><i>Cross-sectional study</i> —Give the eligibility criteria, and the sources and methods of selection of participants | P7   |
|                              |         | (b) <i>Cohort study</i> —For matched studies, give matching criteria and number of exposed and unexposed<br><i>Case-control study</i> —For matched studies, give matching criteria and the number of controls per case                                                                                                                                                                                                                                                 |      |
| Variables                    | 7       | Clearly define all outcomes, exposures, predictors, potential confounders, and effect modifiers. Give diagnostic criteria, if applicable                                                                                                                                                                                                                                                                                                                               | P8   |
| Data sources/<br>measurement | 8*      | For each variable of interest, give sources of data and details of methods of assessment (measurement). Describe comparability of assessment methods if there is more than one group                                                                                                                                                                                                                                                                                   | P6   |
| Bias                         | 9       | Describe any efforts to address potential sources of bias                                                                                                                                                                                                                                                                                                                                                                                                              | P8   |
| Study size                   | 10      | Explain how the study size was arrived at                                                                                                                                                                                                                                                                                                                                                                                                                              | P9   |
| Quantitative variables       | 11      | Explain how quantitative variables were handled in the analyses. If applicable, describe which groupings were chosen and why                                                                                                                                                                                                                                                                                                                                           | P9   |
| Statistical methods          | 12      | (a) Describe all statistical methods, including those used to control for confounding                                                                                                                                                                                                                                                                                                                                                                                  | P9   |
|                              |         | (b) Describe any methods used to examine subgroups and interactions                                                                                                                                                                                                                                                                                                                                                                                                    | P9   |
|                              |         | (c) Explain how missing data were addressed                                                                                                                                                                                                                                                                                                                                                                                                                            | P9   |
|                              |         | (d) <i>Cohort study</i> —If applicable, explain how loss to follow-up was addressed<br><i>Case-control study</i> —If applicable, explain how matching of cases and controls was addressed<br><i>Cross-sectional study</i> —If applicable, describe analytical methods taking account of sampling strategy                                                                                                                                                              | P9   |
|                              |         | (e) Describe any sensitivity analyses                                                                                                                                                                                                                                                                                                                                                                                                                                  |      |

Continued on next page

| <b>Results</b>           |     |                                                                                                                                                                                                                                                                                                                                                                                                               | <b>Page</b>      |
|--------------------------|-----|---------------------------------------------------------------------------------------------------------------------------------------------------------------------------------------------------------------------------------------------------------------------------------------------------------------------------------------------------------------------------------------------------------------|------------------|
| Participants             | 13* | (a) Report numbers of individuals at each stage of study—eg numbers potentially eligible, examined for eligibility, confirmed eligible, included in the study, completing follow-up, and analysed<br>(b) Give reasons for non-participation at each stage<br>(c) Consider use of a flow diagram                                                                                                               | P10<br><br>Fig 1 |
| Descriptive data         | 14* | (a) Give characteristics of study participants (eg demographic, clinical, social) and information on exposures and potential confounders<br>(b) Indicate number of participants with missing data for each variable of interest<br>(c) <i>Cohort study</i> —Summarise follow-up time (eg, average and total amount)                                                                                           | P10<br>Table 1   |
| Outcome data             | 15* | <i>Cohort study</i> —Report numbers of outcome events or summary measures over time<br><i>Case-control study</i> —Report numbers in each exposure category, or summary measures of exposure<br><i>Cross-sectional study</i> —Report numbers of outcome events or summary measures                                                                                                                             | P10              |
| Main results             | 16  | (a) Give unadjusted estimates and, if applicable, confounder-adjusted estimates and their precision (eg, 95% confidence interval). Make clear which confounders were adjusted for and why they were included<br>(b) Report category boundaries when continuous variables were categorized<br>(c) If relevant, consider translating estimates of relative risk into absolute risk for a meaningful time period | P11              |
| Other analyses           | 17  | Report other analyses done—eg analyses of subgroups and interactions, and sensitivity analyses                                                                                                                                                                                                                                                                                                                |                  |
| <b>Discussion</b>        |     |                                                                                                                                                                                                                                                                                                                                                                                                               |                  |
| Key results              | 18  | Summarise key results with reference to study objectives                                                                                                                                                                                                                                                                                                                                                      | P11              |
| Limitations              | 19  | Discuss limitations of the study, taking into account sources of potential bias or imprecision. Discuss both direction and magnitude of any potential bias                                                                                                                                                                                                                                                    | P13              |
| Interpretation           | 20  | Give a cautious overall interpretation of results considering objectives, limitations, multiplicity of analyses, results from similar studies, and other relevant evidence                                                                                                                                                                                                                                    | P12              |
| Generalisability         | 21  | Discuss the generalisability (external validity) of the study results                                                                                                                                                                                                                                                                                                                                         | P13              |
| <b>Other information</b> |     |                                                                                                                                                                                                                                                                                                                                                                                                               |                  |
| Funding                  | 22  | Give the source of funding and the role of the funders for the present study and, if applicable, for the original study on which the present article is based                                                                                                                                                                                                                                                 | P15              |

\*Give information separately for cases and controls in case-control studies and, if applicable, for exposed and unexposed groups in cohort and cross-sectional studies.

**Note:** An Explanation and Elaboration article discusses each checklist item and gives methodological background and published examples of transparent reporting. The STROBE checklist is best used in conjunction with this article (freely available on the Web sites of PLoS Medicine at <http://www.plosmedicine.org/>, Annals of Internal Medicine at <http://www.annals.org/>, and Epidemiology at <http://www.epidem.com/>). Information on the STROBE Initiative is available at [www.strobe-statement.org](http://www.strobe-statement.org).
